# Supplementary material for: Emotional responses in Papua New Guinea show negligible evidence for a universal effect of major versus minor music
Source: PubMed Central journal article supplement (PMC9242494; doi:10.1371/journal.pone.0269597), 2022-06-29
Supplement: pone.0269597.s001.pdf [file pone.0269597.s001.pdf]

# Supplementary Information

## A. Definitions of musicological terms

*Western music.* We define this term to mean any music that makes substantial use of a set of structural features commonly found in European music from at least the 17th century (although some of these date substantially further back in the European tradition; some, somewhat later). These include the use of:

- instruments (and human voice) that produce harmonic complex tones and, hence, induce clearly perceptible pitches;
- a set of discrete pitches tuned to a meantone-like system, the most common of which, in contemporary practice, is 12-tone equal temperament where every octave is divided into 12 equal semitones (a meantone system contains intervals (octaves) with a frequency ratio close to  $2/1$ , and intervals (perfect fifths) with frequency ratios close to, or slightly smaller than,  $3/2$ , which ensures that 4 perfect fifths minus 2 octaves approximates a frequency ratio of  $5/4$ );
- frequent use of the diatonic scale (a *well-formed scale* [1] with 5 large steps and 2 small, where the large steps are approximately twice the size of the small)
- frequent use of major and minor chords and, sometimes, diminished and augmented chords, and their extensions (sevenths, ninths, etc.);
- *modulations* between diatonic scales, which are typically smooth because the two scales will share many common pitches and are typically mediated via a pivot chord that is common to both scales;
- common assertion of a tonic pitch class or tonic major or minor chord through the use of cadences, which are well-established chord progressions that typically involve movement from a dominant seventh chord (or major chord) to a major or minor chord a perfect fifth below and, often, this dominant chord is preceded by a chord containing the scale's fourth degree (the subdominant);
- there is an isochronous hierarchical binary or ternary metrical structure, whereby the fastest metrical level (rhythmic pulse) is grouped into either twos or threes to make a slower metrical level, which is itself grouped into twos or threes to make an even slower metrical level, and so on.

This definition of Western music is, therefore, one that allows for Western music or *Western-like music* to be produced in non-Western countries. For example, the Western-like guitar band music in PNG is strongly informed by Western music (through historical musical training provided by missionaries and the use of Western musical instruments[2]) and comprises almost all of the characteristics of Western music (as defined above), whilst still being quite distinct and recognisable as a genre or style of music that is different from anything actually produced in the West. Of course, this definition of Western music may seem flawed. For example, twentieth century atonal (including most serial) music would not fulfill all of the above criteria and, yet, is clearly a Western phenomenon. However, it is the term 'Western music' that is problematic here, rather than the definition provided above; unfortunately, no other English term is available that can capture all and only the set of features above; furthermore, we feel that in most readers' minds 'Western music' will most readily evoke the characteristics listed above, and this motivates our choice of a practical, though imperfect, term.

*Major and minor.* Common definitions vary depending on whether they are applied to harmony (individual chords or successions of chords) or to melody (successions of pitches). Here, we omit a few definitional nuances so as to concisely summarize them. Major and minor chords both comprise three distinct *pitch classes* (pitch classes consider any two pitches an octave apart to be the same and are expressed in semitone units). Relative to the chord's *root*, the pitch classes of major and minor chords are, respectively, (0, 4, 7) and (0, 3, 7). Hence the mean pitch of a major chord is higher than that of its analogous minor chord.

For sequences of chords, major and minor typically refer to the tonic chord (the *tonic* is the chord or pitch class that serves as a theoretical 'reference', or musical 'centre' or 'home' of the sequence) or to the preponderance of chords in the sequence. In the experiment, we use cadences comprising mostly major chords ending on a major tonic, and cadences comprising mostly minor chords ending on a minor tonic. In general music theory, cadences often indicate the end of a musical phrase [3].

A melody is a sequence of pitches which, like a chord, can be summarized as pitch classes. If the melody has a pitch class 4 semitones above its tonic, it is typically deemed major; if, instead, it has a pitch class 3 semitones above the tonic, it is typically deemed minor. So this definition is analogous to that for chords. However, a more nuanced definition takes into account the intervals between every pitch class in the melody and its tonic. In this experiment, we make use of melodies from 6 (out of a possible 7) *modes* of the *diatonic scale*. The diatonic scale is a well-formed pattern of 5 tones (large steps) and 2 semitones (small steps); each mode of the diatonic scale simply defines which of those scale degrees is considered the tonic. In practice, a piece of music in a given mode will typically start and end on its tonic or otherwise emphasise it; for example, using it as a drone.

The seven different diatonic modes can be ordered by their mean pitch relative to their tonic: Locrian (not traditionally used in Western music, nor in the experiment), Phrygian, *Æolian* (the 'natural' minor scale), Dorian, Mixolydian, Ionian (the major scale), and Lydian. By this ordering, Phrygian can be considered the most minor mode in the experiment; Lydian the most major. The first three modes have a pitch class that is 3 (but not 4) semitones above the tonic; the latter three have a pitch class that is 4 (but not 3) semitones above the tonic.

## B. Background information on the Uruwa River valley

*General background.* The Uruwa River Valley is a remote twelve-village area in the Saruwaged Mountains, Morobe Province, Papua New Guinea. A map of the Uruwa River valley with its villages is presented in Figure 1. Elevation in the area and the surrounding mountains ranges from sea level to peaks of over 4,000 m. As described by Sarvasy[4], there is hardly any level ground and people live, move and cultivate their crops on steep slopes.

As is common in such remote mountain areas of PNG, there are no roads to the area or nearby mountain regions. The Uruwa River Valley is accessible to outsiders only by small airplane; in the six-village southern, higher-elevation part of the river valley, such airplanes must land on an inclined grassy airstrip at Yawan village that was cleared by villagers, using hand tools, over several years in the 1970s, then extended in the 1990s. Historically, the village communities of the Uruwa River Valley are said to have lived in a state of uneasy truce with each other, punctuated by conflicts [5]. This is reflected in the locations of the villages—each is separated from the others by geographic barriers, such as waterways. Each village community comprises two or more clan groups.

*Musical background.* There are two main strands of musical traditions in the Uruwa region, as elsewhere in the region [6]. Older traditional genres are accompanied by hourglass-shaped hand-drums (called *uwing* in Nungon) or by flute. Since the 1970s, a style of Western-influenced sung genre, called *stringben* in Tok Pisin (from *string band*), and characterized by guitar or ukulele accompaniment, has co-existed with the older musical styles [7, 8]. Music is primarily heard in weekly church services, on special occasions, or when individuals sing while going about daily activities, or practice for performances. There are no professional musicians, nor people who specialize in musical performance; traditionally, all women sang and danced in communal gatherings, and all men sang, danced, and played *uwing*. Elementary-age children may learn to sing songs in the local language, Nungon, or in Tok Pisin, at school. Few people in the area own radios or other music players, and there is no mains electricity source for charging mobile electronic devices. There is no equipment for viewing movies or videos in the area; nor, for that matter, are any of the Uruwa people who live in distant diaspora areas known to own televisions.

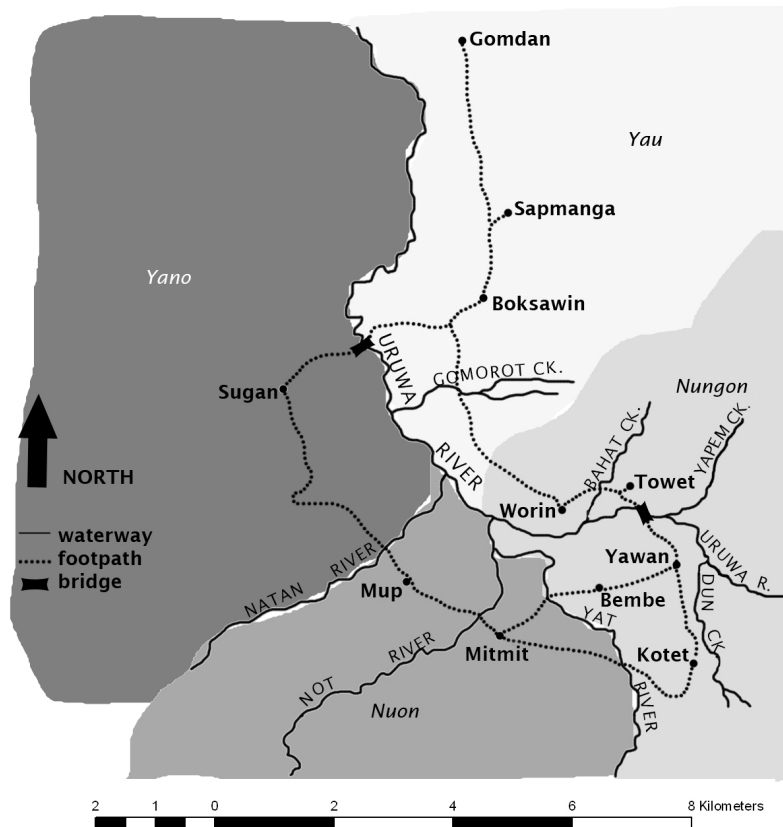

**Fig. 1.** Map of the Uruwa River Valley with villages (bold), rivers (capitals), and language areas (italics). Shadings represent mid-level dialect groupings.

*Linguistic background.* Linguistically, each village had its own language variety, with distinctive pronunciation and vocabulary. One historical dialect, that of Mitmit and Bembe, is nearly obsolete today, due to mass deaths, then intermarriage, several decades ago [4]. Although the term *Nungon* is used nowadays to describe the entire dialect continuum of the six-village, southern Uruwa River Valley communities, this term simply means ‘what’, such that ‘I speak Nungon’ can be understood to mean ‘I say *nungon* for ‘what’’, as opposed to the people of the northern Uruwa villages, who say *yao* or *yano*. As seen in the shading in Figure 1, the term for ‘what’ is actually *nuon* in the dialects of two villages of the southern six (Mup and Mitmit), but structurally these dialects are more similar to those of the four other villages (Worin, Towet, Yawan, and Kotet) than to the northern Uruwa varieties, so these are considered part of the major grouping labeled Nungon. Judging by historical records from 20th-century linguistic surveys of the region [9], it is more traditional, and even today, more precise, to refer to the speech varieties by the village name: so the Towet dialect, Worin dialect, and so forth. The languages of the Uruwa area are classified as belonging to the Finisterre branch of the Finisterre-Huon family of Papuan languages, which straddles the Huon Peninsula and runs into the Finisterre Range, along the border of Madang and Morobe Provinces.

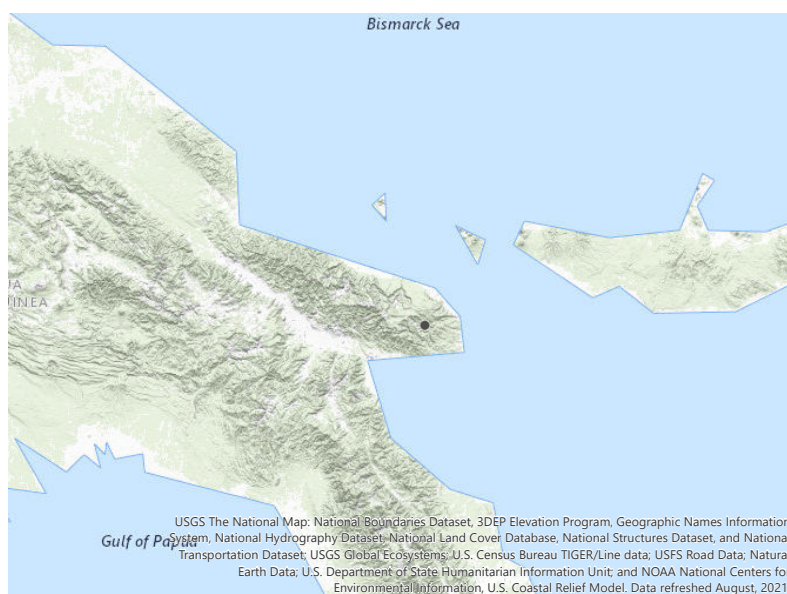

**Fig. 2.** A map of the Huon Peninsula. Image from the USGS National Map viewer (<http://viewer.nationalmap.gov/viewer/>)

*Historical background.* The first European visitor to the region, the Swiss missionary Saueracker, passed through the Uruwa area in 1928 from the region to the east of the Uruwa area, where the distantly related Nukna language is spoken. But most early missionary activity in the Uruwa River Valley was done by Papua New Guinean missionaries who lived in the region for many years, and also introduced coffee farming, cabbage, pumpkin, peanuts, and some other crops. By the 1960s, most people in the area had been baptized as Lutheran Christians. The Lutheran church used another Papuan language, Kâte, as a lingua franca in much of northeast New Guinea, and some older Nungon speakers attended a Kâte school and became literate in Kâte. Songs in the Kâte language are still known by Nungon speakers, and performed occasionally in the Lutheran churches in Worin and Mup. The Lutheran church was known for welcoming local musical traditions and encouraging the use of *uwing* drums and local languages in services. With the advent of the *stringben* style, that also became incorporated into Lutheran services. In contrast, the later-arriving Seventh-Day Adventist church, which made inroads in the Uruwa area from the late 1970s on, strictly prohibited use of any PNG music styles in church services: hymns must be drawn from the official *SDA Hymnal*, and sung to traditional North American and European melodies. People baptized into the SDA church had to renounce playing the *uwing* drum, in addition to the major lifestyle shifts required of SDA adherents: abstention from consuming pork (traditionally, central to feasts and gatherings in much of PNG), tobacco and betelnut. Today, Towet village is the only Uruwa village in which the majority of people adhere to the SDA church. In all other villages, SDA followers are either in the minority or non-existent. Lutheran churches today are found in Worin and Mup villages,

and SDA churches are found in Towet, Yawan, Kotet, and Worin villages. There used to be a Lutheran church in Kotet, which was demolished at the end of 2011.

Economically, the Uruwa area was traditionally linked to other parts of the Huon Peninsula (north-east PNG) by the Vitiaz Strait trade circuits and other trade circuits, whereby Uruwa forest products were traded for coastal products such as clay vessels (see Figure 2). This tradition continued through the 1990s and many Uruwa families maintain “trade-friend” relationships with families at centers along the traditional trade circuits, and have working understanding of the languages spoken in their regions.

A major cultural shift began in 1995 in the southern Uruwa villages, when Towet man Dono Ögate and his wife Eni, who had married into the area from the Nukna region to the east, returned to the region from the port city of Lae and began a concerted effort to ‘develop’ their community. Eni trained as the founding teacher of the first elementary school in Yawan village, established in 1998, and together the couple began distributing non-traditional clothing, such as T-shirts and shorts, to their community, and teaching them to speak and read the English-based creole Tok Pisin. In 2019, Dono Ögate was recognized for this work by the Digicel Foundation: he received the national 2019 Overall Man of Honour award.

In 2009, the YUS Conservation Area (encompassing much of the Uruwa villagers’ highest-elevation landholdings and extending into the neighbouring Som and Yupna regions) was established, through the efforts of local people and an organization, the Tree Kangaroo Conservation Program (TKCP), linked to Seattle’s Woodland Park Zoo. Since then, TKCP has been the major instigator of small-scale development and aid initiatives in the region, and employs a handful of people throughout the YUS Conservation Area, who travel regularly between the TKCP office in Lae and their home villages. The YUS Conservation Area also attracted other academic researchers to the area, including teams from James Cook University (JCU), Conservation International (CI), and the New Guinea Binatang Research Centre (BRC). Most of this research was biology-focused, with the exception of some engagement with villagers around livelihoods (JCU), and the long-term linguistic research by H.S.S.

The majority of this research brought only short-term employment opportunities for a handful of local people, spanning either the length of the foreigners’ field trip, or at most 1–2 years (in the case of BRC). In perhaps the longest-running contractual scheme, H.S.S. has paid several local people, including the three organizers of the 2019 Towet “research fair” to which these experiments belonged, to record and transcribe child speech in Nungon since 2015, as part of a long-term longitudinal study of child language development in the region.

Whether the events described in this subsection significantly impacted participants’ musical experiences over time is uncertain (indeed, models with participants’ age as a smooth spline effect, which ‘interacted’ with our principal effects, did not give consistent or decisive results) but they provide a perspective on changes happening in the area. A more thorough description of the history of the Uruwa River valley can be found in Sarvasy[4].

### C. Analysis of traditional music recordings from Kotet, Yawan, Towet, and Worin

In order to gain some insight into the traditional music across across the area, we analysed six songs from a larger set of audio recordings made by H.S.S. in Kotet, Yawan, Towet, and Worin in 2011–13. The songs were (with a short description):

- **Ex. 1** Joyous song for decorating a young initiand. Performed by Manggirai, a man in his 60s. From Kotet.
- **Ex. 2** Melancholic song sung to the singer by her deceased daughter in a dream. Performed by Inewe, a woman in her 60s. From Kotet.
- **Ex. 3** Melancholic traditional song associated with a legend. When out on a hunting trip with her sister and brother-in-law, a woman enters a cave and has her head chopped off by a demon. Her sister finds her, returns her head to her neck with sticky sap, and hangs the handle of a heavy string bag of game from her forehead, to hold her head in place. Then, as they make their way down the mountain to meet the brother-in-law, the sister sings a mournful song bemoaning her sister’s accident. Performed by Fooyu, a woman in her 50s. From Yawan.
- **Ex. 4** Traditional song associated with preparing to slaughter a pig for a feast: joyous. Performed by Nongi, a man in his 70s. From Towet.
- **Ex. 5** Song composed by the late husband of the singer, as he gazed out over their landholdings and prepared to die. Performed by Irising, a woman in her 60s. From Towet.
- **Ex. 6** Exemplar of the songs that young men sing from a ridge above the village on returning from a successful hunt, alerting their relatives below to start cooking vegetables to accompany the meat. Performed by Yamosi, a boy in his late teens. From Worin.

In all but one recording, there is just one singer. In Ex. 3, a second singer follows – with a small lag – the main singer’s pitch in unison (approximately the same pitch). As shown through the notes above, we selected one song with positive valence and one with sad valence from each village, where available. For Yawan, we chose one sad song because no happy songs were recorded (other recorded songs are in a ‘spirit language’ and are not obviously interpretable as positively or negatively valenced); for Worin, we chose one happy song because no sad songs were recorded.

The pitch intervals in the songs are frequently noticeably microtonal (by which we mean they do not necessarily correspond to the intervals of Western music); furthermore, the pitches are often rather inconsistent. For these reasons, it would be inappropriate for the analysis to rely on a Western notational system of pitches; instead, we use computational pitch detection with fine resolution across both pitch and time. The pitch detection was performed with MATLAB’s Audio Toolbox using the normalized correlation function [10, 11] in 52 ms windows with 42 ms overlaps. For each window, the harmonic ratio (periodicity) of the audio was also calculated in order to select only those portions of the detected pitches that correspond to clearly pitched sounds (such as sung vowels). For each song, the threshold at which the harmonic ratio was deemed high enough to include that portion of the detected pitch, and the pitch range over which the detection algorithm searched, were adjusted by hand to produce a comprehensive but clean pitch envelope.

In Figure 3, for each of the six songs, we graph: (1) on the left, the vocal pitch envelope over the song’s duration and its mean pitch (dotted line); (2) in the middle, a smoothed density plot of pitches over the song’s entire duration (this is a nonperiodic absolute monad expectation vector); (3) on the right, a smoothed density plot of all pitch intervals in the song (this is a nonperiodic relative dyad expectation vector, which is similar to an autocorrelation of the pitch density but, crucially, each individual pitch does not contribute any density at an interval of zero size) [12]. The graphs for (2) and (3) were calculated using the `expectationTensor` function from the Music Perception Toolbox (<https://github.com/andymilne/Music-Perception-Toolbox>); the MATLAB script calling this function, and the pitch detection functions, is available at <https://osf.io/qk4f9>.

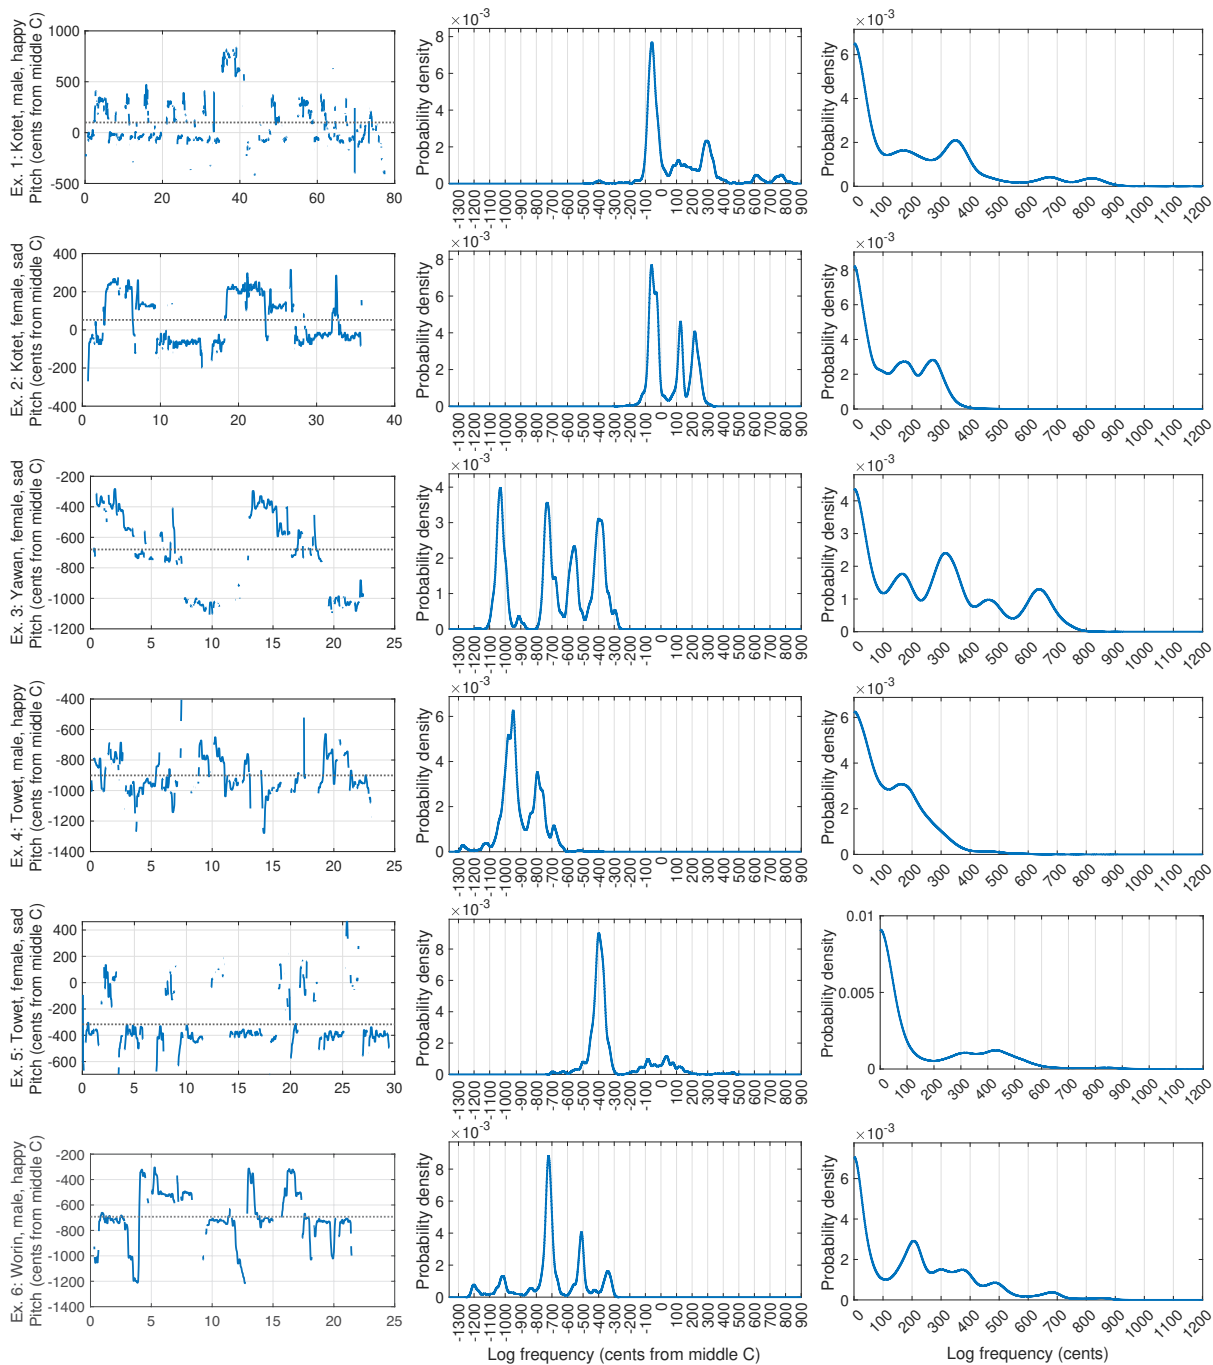

**Fig. 3.** For six songs: pitch envelope (left) in seconds; pitch density (middle); interval density (right).

Informed both by listening and the computations summarized in Figure 3, the pitch content of each piece is now briefly outlined (cents are 100th of standard semitone hence 1200th of a standard octave):

**Ex. 1 (Kotet, male, happy)** comprises more than 6 distinct pitches and is the most complex song to analyse, in part due to a gradual downward shift of the *focal* (most common) pitch, which gradually drops by about one third of a semitone over the first half of the song. The next most frequent pitch is approximately 350 cents higher than the focal pitch, often connected to it by one or more intermediate pitches which are rather variable in tuning. There are also occasional lower pitches, which decorate the focal pitch; these are also variable in tuning. Strikingly, two substantially higher pitches occur midway through the song, which are approximately 7 and 8.5 semitones higher than the focal pitch.

**Ex. 2 (Kotet, female, sad)** comprises 3, or possibly 4, distinct pitches. There is a focal pitch midway between B3 and C4 and two higher pitches, which are approximately 2 and 3 semitones higher. The final two ‘reiterations’ of the focal pitch, however, are sung about 40 cents higher than before creating, for my (A.J.M.) ears, the possibility of a distinct new pitch.

- Ex. 3 (Yawan, female, sad)** comprises a repeated descending sequence of 4 distinct pitches, which loosely approximates a narrowed version of the familiar pentatonic pitch class subset (0, 3, 5, 7) (the outer interval is actually more like 6.5 semitones). This song does not exhibit a unique focal pitch that is emphasised substantially more than any other.
- Ex. 4 (Towet, male, happy)** has 4 distinct pitches: the song alternates between principal pitches approximating D3 and E3 (of which the first is focal), which are decorated with pitches approximating C3 and F3.
- Ex. 5 (Towet, female, sad)** has, perhaps, 3 distinct pitches. There is a distinct lower focal pitch at Ab3. There is another higher pitch, which is rather flexible in tuning and often performed with pitch swoops centred approximately a major third higher than the focal pitch. Near the end there is a brief instance of a distinctly higher pitch about 8 semitones higher than the focal pitch; hence the three pitches loosely approximate those of an augmented triad.
- Ex. 6 (Worin, male, happy)** has 5 distinct pitches approximating C3, D3, F3, G3, A3 and has a distinctly anhemitonic pentatonic flavour with pitch intervals closely approximating those found in Western music. The focal pitch is F3.

We can pick out some interesting generalities across these songs. The mean pitch sung by male and female singers is similar: respectively, 315 and 498 cents below middle C, which are approximately A3 and G3, respectively. The females, therefore, are singing in what would be considered, in Western practice, to be a fairly low register (although close to the typical fundamental frequency of female speech). The pitch range covered by the principal pitches rarely exceeds a perfect fifth (although small in comparison to Western art music, ranges such as this are common in European folk songs). The number of distinct pitches is relatively small (although, given their variability, it is not always clear which pitches are distinct). There is often a focal pitch (or small range of pitches) that is sung substantially more than any other pitch; the only clear exception is Ex. 3, where no pitch seems clearly favoured. The pitches are often sung with noticeable variation – this can be seen in the central column of plots where the peaks are relatively wide.

In terms of intervals between pitches, as shown in the right column of plots (note that these are intervals across the entire song and so include intervals between pitches widely separated in time), we see a clear preponderance of very small intervals. These result from approximate continuations of, or close repetitions of, some pitches (i.e., the broad peaks in the pitch density plots). Beyond that, there is common use of an interval that is a ‘small’ whole tone (180–200 cents), as well as a variety of larger intervals that are often inconsistent within, and certainly between, performances. These larger intervals range up to a maximum of about 850 cents but, as mentioned above, are uncommon greater than about 700 cents. It is worth noting that – beyond the unison interval of 0 cents – there is little correspondence to melodic intervals common in Western music: peaks in the right column of plots typically fall between the semitone grid lines. An exception is Ex. 6, where there are peaks close to all semitone intervals between 200 and 700 cents.

In terms of tonal structure, it is plausible that the focal pitch in a song acts as something loosely analogous to a tonic: a point of frequent return against which the other pitches are intended to be mentally compared. It is worth noting that, of the examples with a distinct focal pitch (1, 2, 4, 5, and 6), the focal pitch is the lowest of the principal pitches in every example except the sixth. Every song’s mean pitch minus its highest density pitch is, in order of example number, 158, 113, 352, 48, 83, and 30 cents.

With regard to whether the songs have happy (Ex. 1, 4, and 6) or sad (Ex. 2, 3, 5) words or performative contexts, there is no obvious association with the just described mean–focal pitch values; there is also no evident association with the number of distinct pitches, the inconsistency (spread) of pitches, or the overall range of pitches used. This accords with the way that Uruwa community members tend to talk about music; in ten years of association with the village, H.S.S. has never heard people describe the melodies of songs as evoking emotions alone; rather, the spare lyrics are the main conduit for emotion. Further, song lyrics themselves can involve the juxtaposition of imagery representing death, for instance, and new life. It is possible that more mournful songs that were not accompanied by dancing (such as Ex. 2, 3, 5) are traditionally sung with slower tempi than more joyous songs. There is also no obvious difference between the songs by village; an observation supported by Dono Ögate who stated that, for old music in Kotet, Yawan, Towet, Worin, Bembe, and Mup, ‘individual songs are different across the communities, but the style is the same’ (translated from Nungon by H.S.S.).



Of course, it may be that emotion is signified via the temporal ordering of pitches, such as might be captured by their contour, the tempo, and the vocal delivery and timbre. We do not focus on these temporal and performative aspects in this subsection because the principal features investigated in the main experiment (cadence type and mean pitch difference) are aggregated over time. As demonstrated in that experiment, in Western music, aggregated pitch features such as these are strongly related to emotive valence.

In summary, across the set of traditional songs analysed here, melodies are monophonic (sung solo or in unison) and rarely exceed a perfect fifth in range. There is typically a 'focal' pitch, which is sung more than any other. With the possible exception of a small whole tone of about 1.75 Western semitones, interval sizes are not consistent between songs and singers, and are somewhat inconsistent within each performance. They do not typically conform with Western intervals. **There** there is no evidence that the aggregated pitch content of each song (e.g., overall pitch range, number of pitches, or mean pitch relative to focal pitch) is associated with whether it has words or performative contexts that are either happy or sad; nor is it associated with the village of origin.

## D. Analysis of *stringben* Lutheran hymn recordings from Towet

Thirty hymns were performed by a group of Towet musicians in two separate sessions: 1 male ukulele player and singer, 1 or 2 (depending on the session) male acoustic guitar players and singers, 1 boy *uwing* drum player, 2 or 5 (depending on the session) female singers also clapping. These were recorded by our research assistants in Worin in May 2020. Twenty of these were randomly selected and their chords analysed by ear. Every piece was in the key of E major (every piece started and ended with an E major chord and used standard cadences); for this reason, the table below shows the proportion of chords with Roman numerals relative to the tonic E major. Only four different chords were used across the twenty songs: the tonic (I) E major was the most common (it was played on 57% of beats); the dominant triad (V) B major was the next most common (21% of beats); the subdominant triad (IV) A major was the third most common (13% of beats); the least common chord was the submediant (VI) C $\sharp$  minor (8%). The E major chord was typically decorated with a thirteenth (C $\sharp$ ) (also known as an added sixth) at the start and end of each song (but not elsewhere), and the E major chord was typically decorated with a seventh (D) – making this a dominant seventh (V7) chord – only when it was the penultimate chord leading to the final tonic E.

**Table 1.** Chords used in twenty hymns performed by Towet musicians in the guitar band style. BPM gives the tempo of the song (the number of beats per minute), No. beats is the total number of beats in each song, the remaining columns give the numbers of beats occupied for the four chords played (I, IV, V, and VI) ignoring extensions (thirteenth and sevenths). The final row gives the median BPM and No. beats, and the percentages for each chord across all twenty hymns. Note that I, IV, and V are major chords, while VI is minor; hence 92% of chords are major and 8% are minor.

| BPM | Key   | No. beats | No. I beats | No. IV beats | No. V beats | No. VI beats |
|-----|-------|-----------|-------------|--------------|-------------|--------------|
| 110 | E maj | 299       | 194         | 0            | 37          | 68           |
| 106 | E maj | 281       | 204         | 0            | 49          | 28           |
| 111 | E maj | 365       | 252         | 80           | 33          | 0            |
| 107 | E maj | 345       | 144         | 20           | 157         | 24           |
| 110 | E maj | 265       | 168         | 24           | 41          | 32           |
| 108 | E maj | 327       | 146         | 28           | 105         | 48           |
| 108 | E maj | 249       | 136         | 52           | 21          | 40           |
| 104 | E maj | 317       | 160         | 64           | 61          | 32           |
| 115 | E maj | 439       | 288         | 48           | 99          | 4            |
| 114 | E maj | 357       | 209         | 76           | 40          | 32           |
| 107 | E maj | 357       | 133         | 56           | 144         | 24           |
| 90  | E maj | 262       | 134         | 40           | 64          | 24           |
| 108 | E maj | 385       | 237         | 64           | 48          | 0            |
| 111 | E maj | 485       | 225         | 60           | 176         | 24           |
| 111 | E maj | 389       | 233         | 22           | 40          | 94           |
| 113 | E maj | 245       | 185         | 18           | 42          | 0            |
| 115 | E maj | 313       | 201         | 44           | 36          | 32           |
| 118 | E maj | 365       | 189         | 32           | 108         | 36           |
| 112 | E maj | 441       | 263         | 134          | 44          | 0            |
| 110 |       | 345       | 57%         | 13%          | 21%         | 8%           |

## E. Analysis of SDA hymns

Thirty-one hymns were randomly selected from the *SDA Hymnal*, which is the source book for all hymns sung at all SDA services in the Uruwa area. They are presented in four-part harmony and were analysed to determine the proportion of chord types (major, minor, diminished, augmented, and suspended) in each hymn and across all hymns. Dominant 7ths and other extensions of major chords are categorized as ‘major’; half-diminished and diminished 7ths as ‘diminished’, extensions of augmented chords are categorized as ‘augmented’; suspended chords are categorized as ‘suspended’ only when they are not obviously passing to a major or minor chord (in which case they are categorized as major or minor, respectively; but these are exceedingly rare, anyway). The results are summarised in Table 2. In summary, there is more variety than found in the Worin recordings but there is still a substantial majority (86%) of major chords. The words for the two minor-key hymns are not intrinsically sad in nature; like most of the hymns, they are focused on praise and worship and have, if anything, a positive emotional valence.

**Table 2.** Proportions of chord-types over 31 hymns randomly selected from the *SDA Hymnal*. For each hymn, the proportions are the number of beats (quavers or crotchets; whichever is appropriate for the song) each chord type is played divided by the total number of beats with any chord in that hymn. Of the 31 hymns, only two are in a minor key. Averaging these proportions across all hymns, 86% of chords are major, 12% are minor, 1% are diminished; less than 0.5% are augmented or suspended.

| Hymn name                            | Hymn No. | Key    | Maj  | Min | Dim | Aug | Sus4 |
|--------------------------------------|----------|--------|------|-----|-----|-----|------|
| There Is a Fountain                  | 336      | Bb maj | 100% | 0%  | 0%  | 0%  | 0%   |
| Lord, Speak to Me                    | 541      | G maj  | 88%  | 9%  | 0%  | 3%  | 0%   |
| Christ for the World                 | 370      | F maj  | 96%  | 4%  | 0%  | 0%  | 0%   |
| Near, Still Nearer                   | 301      | Db maj | 93%  | 7%  | 0%  | 0%  | 0%   |
| Jesus Is All the World to Me         | 185      | G maj  | 86%  | 14% | 0%  | 0%  | 0%   |
| Power in the Blood                   | 294      | F maj  | 100% | 0%  | 0%  | 0%  | 0%   |
| What a Friend We Have in Jesus       | 499      | F maj  | 99%  | 0%  | 1%  | 0%  | 0%   |
| When I Survey the Wondrous Cross     | 154      | F maj  | 83%  | 17% | 0%  | 0%  | 0%   |
| Now Thank We All Our God             | 559      | Eb maj | 77%  | 20% | 3%  | 0%  | 0%   |
| Where Cross the Crowded Ways of Life | 355      | Ab maj | 75%  | 19% | 6%  | 0%  | 0%   |
| Abide With Me                        | 50       | Eb maj | 77%  | 22% | 2%  | 0%  | 0%   |
| My Maker and My King                 | 15       | C maj  | 94%  | 6%  | 0%  | 0%  | 0%   |
| Glorious Things of Thee Are Spoken   | 423      | Eb maj | 89%  | 8%  | 3%  | 0%  | 0%   |
| This Is My Father’s World            | 92       | D maj  | 92%  | 8%  | 0%  | 0%  | 0%   |
| He Leadeth Me                        | 537      | C maj  | 91%  | 9%  | 0%  | 0%  | 0%   |
| O Sing a New Song to the Lord        | 19       | G maj  | 81%  | 19% | 0%  | 0%  | 0%   |
| Lead On, O King Eternal              | 619      | C maj  | 85%  | 15% | 0%  | 0%  | 0%   |
| Ye Servants of God                   | 256      | G maj  | 85%  | 15% | 0%  | 0%  | 0%   |
| Just as I Am                         | 314      | D maj  | 100% | 0%  | 0%  | 0%  | 0%   |
| O Zion, Haste                        | 365      | Ab maj | 88%  | 10% | 0%  | 2%  | 0%   |
| Now Let Us From This Table Rise      | 404      | C maj  | 67%  | 29% | 4%  | 0%  | 0%   |
| Praise God, From Whom All Blessings  | 695      | C maj  | 76%  | 24% | 0%  | 0%  | 0%   |
| I Surrender All                      | 309      | D maj  | 100% | 0%  | 0%  | 0%  | 0%   |
| Dear Lord and Father                 | 481      | C maj  | 86%  | 5%  | 5%  | 0%  | 4%   |
| Shall We Gather at the River         | 432      | Db maj | 100% | 0%  | 0%  | 0%  | 0%   |
| God Has Spoken by His Prophets       | 413      | F min  | 44%  | 48% | 5%  | 0%  | 3%   |
| O Love That Wilt Not Let Me Go       | 76       | G maj  | 90%  | 10% | 0%  | 0%  | 0%   |
| Bless Thou the Gifts                 | 686      | G maj  | 88%  | 9%  | 0%  | 3%  | 0%   |
| The God of Abraham Praise            | 11       | E min  | 68%  | 30% | 2%  | 0%  | 0%   |
| I Will Follow Thee                   | 623      | Ab maj | 99%  | 0%  | 1%  | 0%  | 0%   |
| Give of Your Best to the Master      | 572      | Eb maj | 66%  | 28% | 6%  | 0%  | 0%   |
|                                      |          |        | 86%  | 12% | 1%  | 0%  | 0%   |

## E. Stimuli

### *Cadences*

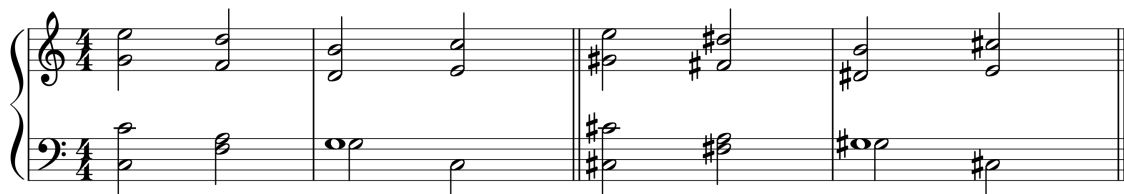

**Fig. 4.** Cadence example C major – C# minor. Each cadence consisted of either mostly major chords or mostly minor chords in order to make any effect of mode as clear as possible, and all chords in a given cadence were from a single diatonic scale in order to avoid any additional effects resulting from scale structure. All cadences had a tonic pitch of B, C or C# in order to decorrelate average pitch height from mode (hence allowing their separate effects to be disambiguated). Given there are 6 different keys (i.e., 2 modes  $\times$  3 tonic pitches), this would lead to a total of 30 ordered pairs (without repetition) to test, however for the sake of experiment time, it was decided to reduce this to a smaller number of pairs. The precise pairs of cadence keys were chosen to ensure that, for each participant, each cadence (characterized by its tonic and its mode) was heard an equal number of times (4 times out of 12 trials), that there was an equal split of major and minor cadences (6 each), and that the average pitch change across the 12 was zero. This led to two slightly different sets of 12 cadences which were allotted evenly between participants. Each cadence followed – as much as feasible within the above constraints – standard musical rules (e.g., voice-leading rules and chord choices). The only traditional compositional rule broken was the use of a minor dominant chord for the minor cadences in order to fulfil the first two constraints stated above.

### *Melodies*

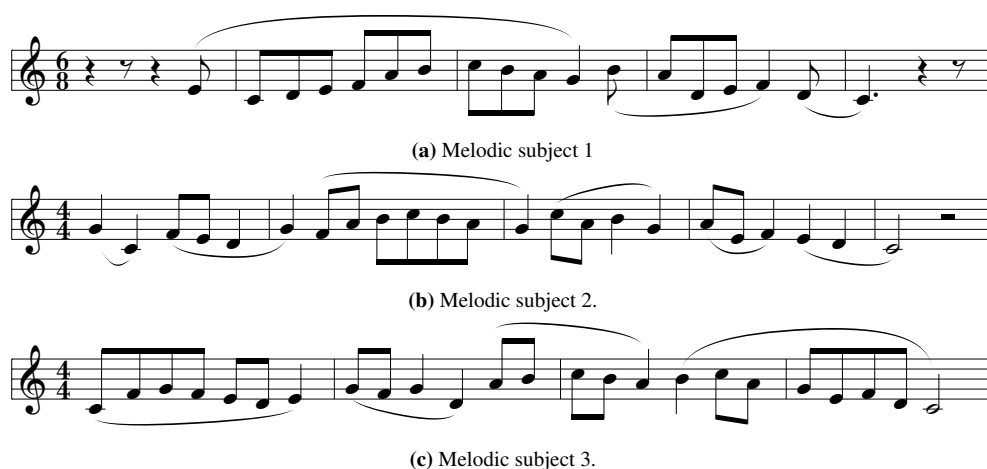

**Fig. 5.** The three melodic subjects used in the experiments. Each subject was played in 6 different modes, obtained by changing the notated key signature: 1 sharp for Lydian, no accidentals for Ionian, 1 flat for Mixolydian, 2 flats for Dorian, 3 flats for  $\text{\AA}$ Eolian, and 4 flats for Phrygian. All melodies were accompanied by a quiet note on C2 and C3. All notes were played legato except for the notes at the end of each slur, which were slightly shortened to help separate the musical phrases. Ignoring these subtle phrase-motivated variations in durations, within each melodic subject, the notes whose pitches changed between any two modes (D, E, F, A, and B) had the same overall duration; for example, in the first subject, every such pitch sounds for a combined duration of 3 quavers (e.g., three quavers or one crotchet and one quaver).

## G. Participant demographics and data exclusions

**Table 3.** Test locations and participant numbers

| Dates                 | Test location | Participants' origin   | No. Participants | Experimenters               |
|-----------------------|---------------|------------------------|------------------|-----------------------------|
| 27 June–7 July 2019   | Towet         | Towet                  | 87               | E. A. Smit, A. J. Milne     |
| 27 June–7 July 2019   | Towet         | Worin                  | 1                | E. A. Smit, A. J. Milne     |
| 14–25 July 2019       | Mup           | Mup                    | 18               | B. Waum, N. Urung           |
| 14–25 July 2019       | Mup           | NA (missing interview) | 1                | B. Waum, N. Urung           |
| 30 July–4 August 2019 | Mitmit        | Mitmit                 | 1                | B. Waum, N. Urung, N. Ögate |
| 30 July–4 August 2019 | Mitmit        | Bembe                  | 19               | B. Waum, N. Urung, N. Ögate |
| 30 July–4 August 2019 | Mitmit        | Worin                  | 3                | B. Waum, N. Urung, N. Ögate |
| 6–8 August 2019       | Kotet         | Kotet                  | 15               | B. Waum, N. Urung, N. Ögate |
| 1–3 October 2019      | Kotet         | Kotet                  | 16               | B. Waum, N. Urung, N. Ögate |
| 3–8 October 2019      | Yawan         | Yawan                  | 9                | B. Waum, N. Urung, N. Ögate |

**Table 4.** Overview of numbers of blocks before and after exclusions due to patterned responses.

| Group                | Block    | No. blocks        |                  |
|----------------------|----------|-------------------|------------------|
|                      |          | Before Exclusions | After Exclusions |
| Uruwa: all           | Cadences | 169               | 111              |
|                      | Melodies | 169               | 122              |
| Uruwa: minimal       | Cadences | 29                | 17               |
|                      | Melodies | 29                | 19               |
| Uruwa: Lutheran      | Cadences | 44                | 35               |
|                      | Melodies | 44                | 36               |
| Uruwa: SDA           | Cadences | 96                | 59               |
|                      | Melodies | 96                | 67               |
| Sydney: all          | Cadences | 79                | 78               |
|                      | Melodies | 79                | 79               |
| Sydney: non-musician | Cadences | 60                | 59               |
|                      | Melodies | 60                | 60               |
| Sydney: musician     | Cadences | 19                | 19               |
|                      | Melodies | 19                | 19               |

**Table 5.** Nationalities of the Sydney participant group

| Nationality            | No. participants |
|------------------------|------------------|
| Australian             | 41               |
| Bangladeshi            | 1                |
| Chinese                | 7                |
| Egyptian               | 1                |
| Greek                  | 4                |
| Indonesian             | 3                |
| Iraqi                  | 4                |
| Lebanese               | 6                |
| Middle Eastern (other) | 1                |
| New Zealand            | 1                |
| Pakistani              | 1                |
| Persian                | 1                |
| Russian                | 1                |
| Spanish                | 2                |
| Sudanese               | 1                |
| Tibetan                | 1                |
| Vietnamese             | 1                |
| Not provided           | 2                |

## **H. Ethics and risk management considerations**

*Ethics* We acknowledge that conducting research cross-culturally is sensitive and requires extensive work to ensure a fruitful collaboration for all parties involved [13]. We appreciate the many challenges involved in cross-cultural research and we aim to be transparent about the processes involved in the current study. Here, we outline the steps that were undertaken to ensure that the presence of researchers would not adversely impact the communities [14]. The study was approved by the Towet community leaders, the Papua New Guinea National Research Institute, and the Western Sydney University Human Research Ethics Committee (H13179).

*Risk management* Dr. Hannah Sarvasy has been adopted as a clan member of the specific community, has been working with the community since 2011, and is fluent in the Nungon language. She has previously conducted language experiments in the community and has established very good relationships with the community. Her extensive knowledge of the community and cultural customs helped to ensure that local cultural values are respected in the design and conduct of the research. The other researchers received advance education by Dr. Sarvasy about local taboos to minimize the risk of participants being offended by the words or actions of a researcher.

Prior to travelling, all decisions regarding the research and the benefits and risks associated with the project were discussed and consulted by phone with local community leaders. No decisions were made without their approval and payment of local research assistants, participants and community members involved in any way with the research was in accordance with the local community leaders.

The experiment was designed to ensure minimum discomfort and a practice part was included in order for participants to familiarise themselves with the equipment. Participants could withdraw from the study at any time without affecting the relationship with the researcher. Participants were able to place the headphones on their heads themselves and adjust the volume accordingly, therefore ensuring the sound levels are comfortable to them. We ensured that, even at the maximum loudness setting, the acoustic levels were still moderate. Participants could stop the experiment and leave at any point without loss of remuneration.

Participation in the research was voluntary for community members and they were remunerated in local currency for their time, earning more than would be possible for a day's labor doing anything else in the region. However, their participation in the research does mean time away from their usual work activities doing farming, childcare, domestic activities, and house construction. Thus, care was taken to ensure that participants' time in the study was minimized as much as possible.

Prior to the fieldwork, management of personal safety risks involved comprehensive briefings by Dr. Hannah Sarvasy of all personnel to minimize the risk of researchers' inadvertently violating local codes of conduct (hence inciting anger). Precautions throughout the trip included continually checking with local community members and leaders to monitor any unanticipated safety risks and to ensure that the community was pleased with how the researchers were conducting themselves.

# Inclusivity in global research

## Ethical considerations, permits and authorship

*This section is applicable to all research types.*

Provide details as to who granted permissions and/or consent for the study to take place in the Methods section of your manuscript. This should include the names of **all** ethics boards, governmental organizations, community leaders or other bodies that provided approval for the study. If individuals provided approval refer to these people by their role or title but do not list their name(s).

Western Sydney University Ethics Human Research Ethics Committee  
The National Research Institute (NRI) of Papua New Guinea  
Towet community leaders

(also reported in the manuscript)

If there were any deviations from the study protocol after approval was obtained please provide details of these changes in the Methods section of your manuscript.

There were no deviations from the study protocol after approval was obtained.

Did this study involve local collaborators that are residents of the country where the research was conducted or members of the community studied? If you do not have any authors from said communities, please provide an explanation for this below.

The research was supported by local residents who hosted us and welcomed us into their communities. We received help with data collection from local research assistants, as described in the manuscript.

Everyone listed as an author should meet PLOS' criteria for authorship and all individuals who meet these criteria should be included in the author byline, rather than the acknowledgements. Authorship criteria is based on the International Committee of Medical Journal Editors (ICMJE) Uniform Requirements for Manuscripts Submitted to Biomedical Journals - for further information please see here:

<https://journals.plos.org/plosone/s/authorship>.

**Human subjects research (e.g. health research, medical research, cross-cultural psychology)**

Did you obtain written informed consent from a representative of the local community or region before the research took place? How did you establish who speaks for the community? Details of written informed consent obtained from study participants should be reported separately in the Methods section of your manuscript.

Before the research took place, Dr. Hannah S. Sarvasy had regular contact by phone with the community leaders to discuss the research and the impact of the research on the community and received consent for the research over phone. Dr. Hannah Sarvasy has been adopted as a clan member of the specific community, has been working with the community since 2011, and is fluent in the Nungon language. She has previously conducted language experiments in the community and has established very good

How did members of the local community provide input on the aims of the research investigation, its

Similar to above, Dr. Hannah S. Sarvasy had regular contact with the community leaders over phone before the research trip took place and discussed the aims of the research, the best suitable methods and anticipated outcomes with them.

methodology, and its anticipated outcome(s)?

When engaging with the local community, how did you ensure that the informed consent documents and other materials could be understood by local stakeholders?

Dr. Hannah S. Sarvasy is fluent in the local language, and helped to translate the necessary documents to the local research assistants. The local research assistants also spoke some English, and were thus able to communicate with the researchers in English as well. The local research assistants translated the informed consent documents to participants.

Will the findings of the research be made available in an understandable format to stakeholders in the community where the study was conducted (e.g. via a presentation, summary report, copies of publications, etc.)? Please provide details of how this will be achieved.

We will provide copies of the publications to the community and aim to record a presentation on the research findings that can be shown in the community.

**Non-human subjects research using specimens/ animals collected as part of the study, or those housed in archival collections. Examples include archaeology, paleontology, botany and zoology.**



Did the permission you obtained from a local authority to perform the study include an agreement on access to outputs and benefit sharing? This may include procedures to enable fair distribution of the benefits and resources arising from the research performed. Please include any details of Prior Informed Consent and Benefit Sharing Agreements obtained. These may be required by field-specific regulations, for example the Convention on Biological Diversity (CBD) and the associated Nagoya Protocol.

NA

If the material used in your study was imported, please A) provide the year it was imported and B) indicate whether permits were obtained to import/export the materials used, C) provide details of any permits obtained. If this information is not available, please indicate this.

NA

If you used archival specimens, please state how the material used in your study was acquired by the institute it is held in and provide details of any permits obtained for the original excavations/ sample collection. If this information is not available, please indicate this.

NA

How was the potential cultural significance of the materials collected in your study to local communities considered in your research design? Were Indigenous peoples and/or local researchers and institutions involved with archaeological excavations / collection of specimens? If so, please provide a description of their involvement.

NA

---

If your manuscript includes photographs of human remains please indicate whether authors obtained permission from descendants or affiliated cultural communities to do so.

NA

## I. Uruwa interview

The interview with participants from the Uruwa River Valley consisted of the following questions with possible answers provided in brackets:

1. What is your age?
2. Which village are you from?
3. Male/female?
4. Do you go to church? (Yes; no; sometimes)
5. Which do you go to? (SDA; Lutheran; I do not go to church)
6. When you go to church, do you sing songs or do you just listen? (I sing; I just listen)
7. Are you a song leader? (Yes; no)
8. Do you sing hymns outside of church? (Yes; no; sometimes)
9. When they sing songs, do you understand the words you sing?(Yes; no; sometimes)
10. Are you always happy or always sad when you hear all church songs, or are you happy when you hear some church songs and sad when you hear other songs? (Always happy; always sad; sometimes happy sometimes sad)
11. Why? Is the meaning of the words grabbing you that you feel sad or the sound? (Meaning of the words; the sound; meaning of the words and the sound)
12. Did you used to try different songs? (Yes; no)
13. What types of music did you used to play or sing? (*Biru* (a local flute); *uwing* (an hour glass shaped drum); guitar)
14. If a song seized you on the insides, how did it make you feel? (Happy; sad; sometimes happy sometimes sad)
15. When you used to sing a song in other peoples' language, would you understand? (Yes; no)
16. When you were small, how did the older people used to do songs or music? (*Biru*; *uwing*; guitar)
17. These days on your phone or radio, what songs do you find beautiful? (Open question, only answered if people have a phone or radio)
18. These days, do you listen to songs from other places or not? (Yes; no)
19. From where?

## J. Full summaries of hypothesis-driven models

All models outputs show the following regression coefficients of the group-level and population-level effects:

- *Estimate*: mean coefficient of the posterior distribution.
- *Estimate error*: standard deviation of the posterior distribution.
- *l-95% CI* and *u-95% CI*: lower and upper 95% credibility intervals.
- *Rhat*: provides information on the convergence of the algorithm.
- *Bulk ESS* and *Tail ESS*: effective sample size measures.

### Cadences

#### Uruwa: Minimal Exposure

```
Family: bernoulli
Links: mu = logit
Formula: bin_response ~ (cad_model1 * cad_mode2 + diff_mean_pitch1_2) * timbre + (cad_model1 * cad_mode2 + diff_mean_pitch1_2 | participant)
Data: data_cut_min_cad (Number of observations: 204)
Samples: 4 chains, each with iter = 6000; warmup = 1000; thin = 1;
total post-warmup samples = 20000
```

Group-Level Effects:  
 $\tau$ participant (Number of levels: 17)

|                                                    | Estimate | Est.Error | 1-95% CI | u-95% CI | Rhat | Bulk_ESS | Tail_ESS |
|----------------------------------------------------|----------|-----------|----------|----------|------|----------|----------|
| sd(Intercept)                                      | 1.49     | 0.45      | 0.79     | 2.54     | 1.00 | 7129     | 11841    |
| sd(cad_model1Min)                                  | 0.37     | 0.26      | 0.01     | 0.99     | 1.00 | 7010     | 8490     |
| sd(cad_mode2Min)                                   | 0.73     | 0.38      | 0.08     | 1.58     | 1.00 | 4897     | 5296     |
| sd(diff_mean_pitch1_2)                             | 0.38     | 0.26      | 0.02     | 1.00     | 1.00 | 7656     | 9302     |
| sd(cad_model1Min:cad_mode2Min)                     | 0.89     | 0.39      | 0.17     | 1.72     | 1.00 | 5619     | 4377     |
| cor(Intercept,cad_model1Min)                       | 0.17     | 0.39      | -0.65    | 0.82     | 1.00 | 22749    | 14094    |
| cor(Intercept,cad_mode2Min)                        | 0.10     | 0.35      | -0.59    | 0.72     | 1.00 | 16658    | 14769    |
| cor(cad_model1Min,cad_mode2Min)                    | 0.16     | 0.40      | -0.66    | 0.82     | 1.00 | 7750     | 11981    |
| cor(Intercept,diff_mean_pitch1_2)                  | -0.13    | 0.38      | -0.79    | 0.63     | 1.00 | 21919    | 14806    |
| cor(cad_model1Min,diff_mean_pitch1_2)              | -0.15    | 0.41      | -0.83    | 0.67     | 1.00 | 11844    | 14214    |
| cor(cad_mode2Min,diff_mean_pitch1_2)               | -0.20    | 0.39      | -0.83    | 0.61     | 1.00 | 15756    | 15359    |
| cor(Intercept,cad_model1Min:cad_mode2Min)          | -0.11    | 0.33      | -0.70    | 0.55     | 1.00 | 15792    | 13309    |
| cor(cad_model1Min,cad_mode2Min:timbreStrings)      | -0.12    | 0.40      | -0.80    | 0.67     | 1.00 | 6453     | 10324    |
| cor(cad_mode2Min,cad_model1Min:cad_mode2Min)       | -0.17    | 0.36      | -0.79    | 0.56     | 1.00 | 10349    | 13604    |
| cor(diff_mean_pitch1_2,cad_model1Min:cad_mode2Min) | 0.13     | 0.39      | -0.64    | 0.80     | 1.00 | 8607     | 13887    |

Population-Level Effects:

|                                          | Estimate | Est.Error | 1-95% CI | u-95% CI | Rhat | Bulk_ESS | Tail_ESS |
|------------------------------------------|----------|-----------|----------|----------|------|----------|----------|
| Intercept                                | -0.34    | 0.39      | -1.12    | 0.43     | 1.00 | 8106     | 12061    |
| cad_model1Min                            | -0.03    | 0.21      | -0.44    | 0.39     | 1.00 | 21751    | 13844    |
| cad_mode2Min                             | 0.04     | 0.26      | -0.48    | 0.55     | 1.00 | 14817    | 14192    |
| diff_mean_pitch1_2                       | -0.08    | 0.19      | -0.47    | 0.30     | 1.00 | 18120    | 14937    |
| timbreStrings                            | -0.26    | 0.38      | -1.05    | 0.47     | 1.00 | 8273     | 11123    |
| cad_model1Min:cad_mode2Min               | -0.08    | 0.28      | -0.65    | 0.48     | 1.00 | 16278    | 14503    |
| cad_model1Min:timbreStrings              | -0.11    | 0.21      | -0.53    | 0.31     | 1.00 | 20181    | 14765    |
| cad_mode2Min:timbreStrings               | 0.04     | 0.26      | -0.48    | 0.58     | 1.00 | 15199    | 13781    |
| diff_mean_pitch1_2:timbreStrings         | 0.11     | 0.19      | -0.27    | 0.50     | 1.00 | 19703    | 14212    |
| cad_model1Min:cad_mode2Min:timbreStrings | -0.16    | 0.28      | -0.74    | 0.40     | 1.00 | 15128    | 13988    |

#### Uruwa: SDA

```
Family: bernoulli
Links: mu = logit
Formula: bin_response ~ (cad_model1 * cad_mode2 + diff_mean_pitch1_2) * timbre + (cad_model1 * cad_mode2 + diff_mean_pitch1_2 | participant)
Data: data_cut_SDA_cad (Number of observations: 708)
Samples: 4 chains, each with iter = 6000; warmup = 1000; thin = 1;
total post-warmup samples = 20000
```

Group-Level Effects:  
 $\tau$ participant (Number of levels: 59)

|                                                    | Estimate | Est.Error | 1-95% CI | u-95% CI | Rhat | Bulk_ESS | Tail_ESS |
|----------------------------------------------------|----------|-----------|----------|----------|------|----------|----------|
| sd(Intercept)                                      | 0.74     | 0.15      | 0.48     | 1.05     | 1.00 | 8100     | 13573    |
| sd(cad_model1Min)                                  | 0.36     | 0.15      | 0.04     | 0.66     | 1.00 | 5665     | 5432     |
| sd(cad_mode2Min)                                   | 0.29     | 0.16      | 0.02     | 0.62     | 1.00 | 5062     | 8285     |
| sd(diff_mean_pitch1_2)                             | 0.22     | 0.14      | 0.01     | 0.51     | 1.00 | 5180     | 8528     |
| sd(cad_model1Min:cad_mode2Min)                     | 0.18     | 0.13      | 0.01     | 0.47     | 1.00 | 7194     | 10976    |
| cor(Intercept,cad_model1Min)                       | -0.51    | 0.28      | -0.91    | 0.20     | 1.00 | 13013    | 12363    |
| cor(Intercept,cad_mode2Min)                        | 0.12     | 0.34      | -0.58    | 0.73     | 1.00 | 20254    | 14025    |
| cor(cad_model1Min,cad_mode2Min)                    | -0.08    | 0.37      | -0.75    | 0.64     | 1.00 | 13181    | 14937    |
| cor(Intercept,diff_mean_pitch1_2)                  | -0.19    | 0.35      | -0.79    | 0.57     | 1.00 | 19896    | 13956    |
| cor(cad_model1Min,diff_mean_pitch1_2)              | -0.03    | 0.38      | -0.73    | 0.70     | 1.00 | 15828    | 15268    |
| cor(cad_mode2Min,diff_mean_pitch1_2)               | 0.04     | 0.39      | -0.71    | 0.75     | 1.00 | 14152    | 15720    |
| cor(Intercept,cad_model1Min:cad_mode2Min)          | 0.11     | 0.38      | -0.65    | 0.77     | 1.00 | 26118    | 14856    |
| cor(cad_model1Min,cad_mode2Min:timbreStrings)      | -0.01    | 0.39      | -0.74    | 0.73     | 1.00 | 20068    | 16054    |
| cor(cad_mode2Min,cad_model1Min:cad_mode2Min)       | 0.17     | 0.40      | -0.66    | 0.83     | 1.00 | 14735    | 16272    |
| cor(diff_mean_pitch1_2,cad_model1Min:cad_mode2Min) | 0.02     | 0.40      | -0.74    | 0.76     | 1.00 | 17813    | 17206    |

Population-Level Effects:

|                                          | Estimate | Est.Error | 1-95% CI | u-95% CI | Rhat | Bulk_ESS | Tail_ESS |
|------------------------------------------|----------|-----------|----------|----------|------|----------|----------|
| Intercept                                | 0.30     | 0.13      | 0.05     | 0.56     | 1.00 | 14574    | 15576    |
| cad_model1Min                            | 0.19     | 0.10      | -0.01    | 0.39     | 1.00 | 25081    | 14367    |
| cad_mode2Min                             | -0.34    | 0.10      | -0.53    | -0.15    | 1.00 | 28136    | 15841    |
| diff_mean_pitch1_2                       | 0.08     | 0.08      | -0.09    | 0.24     | 1.00 | 28267    | 15639    |
| timbreStrings                            | 0.07     | 0.13      | -0.18    | 0.32     | 1.00 | 13875    | 14882    |
| cad_model1Min:cad_mode2Min               | 0.05     | 0.09      | -0.12    | 0.23     | 1.00 | 36536    | 13526    |
| cad_model1Min:timbreStrings              | -0.15    | 0.10      | -0.34    | 0.05     | 1.00 | 22630    | 15174    |
| cad_mode2Min:timbreStrings               | 0.03     | 0.10      | -0.16    | 0.21     | 1.00 | 26998    | 15568    |
| diff_mean_pitch1_2:timbreStrings         | 0.01     | 0.08      | -0.15    | 0.17     | 1.00 | 31574    | 16344    |
| cad_model1Min:cad_mode2Min:timbreStrings | -0.07    | 0.09      | -0.25    | 0.11     | 1.00 | 33116    | 15225    |

#### Uruwa: Lutheran

```
Family: bernoulli
Links: mu = logit
Formula: bin_response ~ (cad_model1 * cad_mode2 + diff_mean_pitch1_2) * timbre + (cad_model1 * cad_mode2 + diff_mean_pitch1_2 | participant)
Data: data_cut_Lut_cad (Number of observations: 420)
Samples: 4 chains, each with iter = 6000; warmup = 1000; thin = 1;
total post-warmup samples = 20000
```

Group-Level Effects:

```

^participant (Number of levels: 35)
      Estimate Est.Error 1-95% CI u-95% CI Rhat Bulk_ESS Tail_ESS
sd(Intercept)          1.07    0.26    0.62    1.64 1.00    6944 10791
sd(cad_mode1Min)       0.62    0.24    0.16    1.12 1.00    6023  5327
sd(cad_mode2Min)       1.01    0.26    0.57    1.57 1.00    8514 12922
sd(diff_mean_pitch1_2) 0.64    0.22    0.22    1.10 1.00    6981  6938
sd(cad_mode1Min:cad_mode2Min) 0.48    0.26    0.03    1.02 1.00    5001  7199
cor(Intercept,cad_mode1Min) -0.17    0.31   -0.72    0.46 1.00   14494 14483
cor(Intercept,cad_mode2Min)  0.22    0.26   -0.31    0.68 1.00    9538 13266
cor(cad_mode1Min,cad_mode2Min) -0.22    0.31   -0.77    0.40 1.00    5369  9313
cor(Intercept,diff_mean_pitch1_2) -0.16    0.29   -0.68    0.42 1.00   13568 13820
cor(cad_mode1Min,diff_mean_pitch1_2) 0.46    0.29   -0.20    0.89 1.00    7342  8780
cor(cad_mode2Min,diff_mean_pitch1_2) -0.29    0.28   -0.78    0.30 1.00   14228 15383
cor(Intercept,cad_mode1Min:cad_mode2Min) 0.13    0.34   -0.57    0.74 1.00   17821 15368
cor(cad_mode1Min,cad_mode1Min:cad_mode2Min) 0.12    0.36   -0.61    0.77 1.00   11938 15330
cor(cad_mode2Min,cad_mode1Min:cad_mode2Min) -0.18    0.34   -0.77    0.54 1.00   16161 16001
cor(diff_mean_pitch1_2,cad_mode1Min:cad_mode2Min) 0.05    0.35   -0.64    0.71 1.00   15338 16551

```

```

Population-Level Effects:
      Estimate Est.Error 1-95% CI u-95% CI Rhat Bulk_ESS Tail_ESS
Intercept          0.24    0.22   -0.18    0.67 1.00   11705 12501
cad_mode1Min       0.20    0.17   -0.13    0.54 1.00   17204 14438
cad_mode2Min      -0.25    0.21   -0.66    0.17 1.00   14581 14940
diff_mean_pitch1_2 0.27    0.16   -0.05    0.59 1.00   16322 14184
timbreStrings      0.18    0.22   -0.25    0.62 1.00   13767 14072
cad_mode1Min:cad_mode2Min 0.05    0.16   -0.25    0.36 1.00   18261 13069
cad_mode1Min:timbreStrings -0.15    0.17   -0.49    0.18 1.00   17125 14386
cad_mode2Min:timbreStrings 0.14    0.21   -0.27    0.57 1.00   15459 14019
diff_mean_pitch1_2:timbreStrings 0.21    0.16   -0.10    0.53 1.00   18068 14865
cad_mode1Min:cad_mode2Min:timbreStrings 0.06    0.15   -0.25    0.36 1.00   20420 14119

```

## Sydney: Non-musician

```

Family: bernoulli
Links: mu = logit
Formula: bin_response ~ (cad_mode1 * cad_mode2 + diff_mean_pitch1_2) * timbre + (cad_mode1 * cad_mode2 + diff_mean_pitch1_2 | participant)
Data: data_cut_nonmus_cad (Number of observations: 707)
Samples: 4 chains, each with iter = 6000; warmup = 1000; thin = 1;
         total post-warmup samples = 20000

```

```

Group-Level Effects:
^participant (Number of levels: 59)
      Estimate Est.Error 1-95% CI u-95% CI Rhat Bulk_ESS Tail_ESS
sd(Intercept)          0.67    0.19    0.31    1.05 1.00    6254  5529
sd(cad_mode1Min)       0.43    0.20    0.05    0.84 1.00    5372  6328
sd(cad_mode2Min)       0.83    0.19    0.48    1.23 1.00    7922 11725
sd(diff_mean_pitch1_2) 0.74    0.18    0.42    1.12 1.00    8792 12294
sd(cad_mode1Min:cad_mode2Min) 0.18    0.13    0.01    0.50 1.00    9692 11326
cor(Intercept,cad_mode1Min) 0.16    0.33   -0.52    0.76 1.00   13262 12660
cor(Intercept,cad_mode2Min) -0.07    0.27   -0.59    0.46 1.00    7144 10142
cor(cad_mode1Min,cad_mode2Min) -0.34    0.31   -0.84    0.36 1.00    4492  5743
cor(Intercept,diff_mean_pitch1_2) 0.34    0.25   -0.19    0.78 1.00    7041 10791
cor(cad_mode1Min,diff_mean_pitch1_2) 0.36    0.31   -0.33    0.85 1.00    4582  6721
cor(cad_mode2Min,diff_mean_pitch1_2) -0.39    0.23   -0.79    0.09 1.00    9530 13450
cor(Intercept,cad_mode1Min:cad_mode2Min) 0.10    0.39   -0.67    0.79 1.00   29254 16449
cor(cad_mode1Min,cad_mode1Min:cad_mode2Min) 0.03    0.41   -0.74    0.77 1.00   24195 15481
cor(cad_mode2Min,cad_mode1Min:cad_mode2Min) -0.05    0.39   -0.76    0.71 1.00   28930 17015
cor(diff_mean_pitch1_2,cad_mode1Min:cad_mode2Min) 0.09    0.39   -0.68    0.78 1.00   26206 17501

```

```

Population-Level Effects:
      Estimate Est.Error 1-95% CI u-95% CI Rhat Bulk_ESS Tail_ESS
Intercept          -0.19    0.14   -0.49    0.08 1.00   18176 15136
cad_mode1Min       0.57    0.14    0.31    0.85 1.00   14951 14771
cad_mode2Min      -1.17    0.17   -1.51   -0.86 1.00   15093 13774
diff_mean_pitch1_2 0.91    0.15    0.63    1.22 1.00   16336 14524
timbreStrings     -0.11    0.14   -0.38    0.16 1.00   22369 16575
cad_mode1Min:cad_mode2Min -0.04    0.12   -0.26    0.19 1.00   30954 15905
cad_mode1Min:timbreStrings -0.09    0.13   -0.34    0.16 1.00   27487 16023
cad_mode2Min:timbreStrings -0.29    0.16   -0.60    0.02 1.00   21137 15313
diff_mean_pitch1_2:timbreStrings -0.13    0.14   -0.42    0.14 1.00   19687 15516
cad_mode1Min:cad_mode2Min:timbreStrings 0.05    0.11   -0.17    0.26 1.00   38298 15090

```

## Sydney: Musician

```

Family: bernoulli
Links: mu = logit
Formula: bin_response ~ (cad_mode1 * cad_mode2 + diff_mean_pitch1_2) * timbre + (cad_mode1 * cad_mode2 + diff_mean_pitch1_2 | participant)
Data: data_cut_mus_cad (Number of observations: 228)
Samples: 4 chains, each with iter = 6000; warmup = 1000; thin = 1;
         total post-warmup samples = 20000

```

```

Group-Level Effects:
^participant (Number of levels: 19)
      Estimate Est.Error 1-95% CI u-95% CI Rhat Bulk_ESS Tail_ESS
sd(Intercept)          0.92    0.54    0.07    2.11 1.00    5469  7257
sd(cad_mode1Min)       0.49    0.39    0.02    1.44 1.00   11137 10555
sd(cad_mode2Min)       1.50    0.62    0.42    2.90 1.00    5736  5340
sd(diff_mean_pitch1_2) 0.56    0.39    0.03    1.47 1.00    7421  9634
sd(cad_mode1Min:cad_mode2Min) 0.87    0.53    0.05    2.05 1.00    5195  8069
cor(Intercept,cad_mode1Min) -0.02    0.40   -0.76    0.74 1.00   26271 14540
cor(Intercept,cad_mode2Min)  0.06    0.36   -0.66    0.72 1.00    7864 10894
cor(cad_mode1Min,cad_mode2Min) -0.11    0.41   -0.81    0.69 1.00    5776 10557
cor(Intercept,diff_mean_pitch1_2) 0.11    0.39   -0.66    0.79 1.00   16706 15032
cor(cad_mode1Min,diff_mean_pitch1_2) -0.00    0.41   -0.75    0.75 1.00   12355 14873
cor(cad_mode2Min,diff_mean_pitch1_2) 0.15    0.38   -0.63    0.80 1.00   19486 16275
cor(Intercept,cad_mode1Min:cad_mode2Min) -0.15    0.39   -0.80    0.65 1.00   12968 13736
cor(cad_mode1Min,cad_mode1Min:cad_mode2Min) 0.00    0.40   -0.74    0.74 1.00   12897 14352
cor(cad_mode2Min,cad_mode1Min:cad_mode2Min) 0.07    0.37   -0.65    0.74 1.00   18117 16826
cor(diff_mean_pitch1_2,cad_mode1Min:cad_mode2Min) -0.14    0.39   -0.81    0.66 1.00   12673 15804

```

```

Population-Level Effects:
      Estimate Est.Error 1-95% CI u-95% CI Rhat Bulk_ESS Tail_ESS
Intercept          0.15    0.41   -0.65    0.97 1.00   15437 13678
cad_mode1Min       1.74    0.49    0.93    2.86 1.00   10619  8887
cad_mode2Min      -2.74    0.65   -4.20   -1.63 1.00    9584  9720
diff_mean_pitch1_2 1.15    0.30    0.61    1.78 1.00   18811 12885
timbreStrings     -0.26    0.39   -1.05    0.49 1.00   16315 13681
cad_mode1Min:cad_mode2Min -0.48    0.41   -1.31    0.28 1.00   15478 12879
cad_mode1Min:timbreStrings -0.35    0.37   -1.11    0.35 1.00   15757 12856
cad_mode2Min:timbreStrings -0.12    0.47   -1.05    0.82 1.00   15050 13138
diff_mean_pitch1_2:timbreStrings -0.13    0.27   -0.68    0.40 1.00   22119 14451
cad_mode1Min:cad_mode2Min:timbreStrings 0.27    0.39   -0.50    1.04 1.00   16592 13544

```

## Melodies

### Uruwa: Minimal Exposure

Family: bernoulli  
Links: mu = logit  
Formula: bin\_response ~ diff\_mean\_pitch1\_2 \* timbre \* melody + (diff\_mean\_pitch1\_2 \* melody | participant)  
Data: data\_cut\_min\_mel (Number of observations: 569)  
Samples: 4 chains, each with iter = 6000; warmup = 1000; thin = 1;  
total post-warmup samples = 20000

Group-Level Effects:  
\*participant (Number of levels: 19)

|                                                            | Estimate | Est.Error | 1-95% CI | u-95% CI | Rhat | Bulk_ESS | Tail_ESS |
|------------------------------------------------------------|----------|-----------|----------|----------|------|----------|----------|
| sd(Intercept)                                              | 1.67     | 0.36      | 1.09     | 2.50     | 1.00 | 8811     | 13064    |
| sd(diff_mean_pitch1_2)                                     | 0.79     | 0.51      | 0.04     | 1.94     | 1.00 | 7225     | 10484    |
| sd(melody1)                                                | 0.37     | 0.22      | 0.02     | 0.86     | 1.00 | 7735     | 10293    |
| sd(melody2)                                                | 0.19     | 0.15      | 0.01     | 0.56     | 1.00 | 12594    | 12283    |
| sd(diff_mean_pitch1_2:melody1)                             | 0.74     | 0.55      | 0.03     | 2.04     | 1.00 | 10327    | 12235    |
| sd(diff_mean_pitch1_2:melody2)                             | 0.67     | 0.53      | 0.02     | 1.98     | 1.00 | 11540    | 10538    |
| cor(Intercept,diff_mean_pitch1_2)                          | -0.02    | 0.35      | -0.68    | 0.64     | 1.00 | 32339    | 13839    |
| cor(Intercept,melody1)                                     | 0.02     | 0.35      | -0.65    | 0.66     | 1.00 | 33150    | 15275    |
| cor(diff_mean_pitch1_2,melody1)                            | -0.20    | 0.37      | -0.81    | 0.57     | 1.00 | 13825    | 15086    |
| cor(Intercept,melody2)                                     | -0.08    | 0.38      | -0.76    | 0.66     | 1.00 | 39201    | 14848    |
| cor(diff_mean_pitch1_2,melody2)                            | -0.04    | 0.38      | -0.73    | 0.68     | 1.00 | 22316    | 16353    |
| cor(melody1,melody2)                                       | -0.05    | 0.38      | -0.73    | 0.68     | 1.00 | 22604    | 17223    |
| cor(Intercept,diff_mean_pitch1_2:melody1)                  | -0.17    | 0.37      | -0.78    | 0.60     | 1.00 | 30002    | 15765    |
| cor(diff_mean_pitch1_2,diff_mean_pitch1_2:melody1)         | -0.04    | 0.38      | -0.73    | 0.68     | 1.00 | 21651    | 15847    |
| cor(melody1,diff_mean_pitch1_2:melody1)                    | 0.07     | 0.37      | -0.66    | 0.74     | 1.00 | 19536    | 15958    |
| cor(melody2,diff_mean_pitch1_2:melody1)                    | 0.02     | 0.38      | -0.69    | 0.72     | 1.00 | 15356    | 17038    |
| cor(Intercept,diff_mean_pitch1_2:melody2)                  | -0.03    | 0.37      | -0.71    | 0.68     | 1.00 | 39020    | 13507    |
| cor(diff_mean_pitch1_2,diff_mean_pitch1_2:melody2)         | 0.01     | 0.37      | -0.70    | 0.70     | 1.00 | 25178    | 16121    |
| cor(melody1,diff_mean_pitch1_2:melody2)                    | -0.03    | 0.38      | -0.72    | 0.69     | 1.00 | 22007    | 16648    |
| cor(melody2,diff_mean_pitch1_2:melody2)                    | 0.02     | 0.38      | -0.70    | 0.73     | 1.00 | 15502    | 16308    |
| cor(diff_mean_pitch1_2:melody1,diff_mean_pitch1_2:melody2) | -0.09    | 0.38      | -0.77    | 0.65     | 1.00 | 14994    | 17365    |

Population-Level Effects:

|                                          | Estimate | Est.Error | 1-95% CI | u-95% CI | Rhat | Bulk_ESS | Tail_ESS |
|------------------------------------------|----------|-----------|----------|----------|------|----------|----------|
| Intercept                                | -0.27    | 0.38      | -1.01    | 0.47     | 1.00 | 6732     | 9703     |
| diff_mean_pitch1_2                       | 0.09     | 0.37      | -0.65    | 0.80     | 1.00 | 27148    | 16002    |
| timbreStrings                            | -0.09    | 0.37      | -0.83    | 0.63     | 1.00 | 6765     | 10553    |
| melody1                                  | -0.27    | 0.19      | -0.64    | 0.10     | 1.00 | 23084    | 16458    |
| melody2                                  | 0.12     | 0.17      | -0.21    | 0.44     | 1.00 | 25292    | 16387    |
| diff_mean_pitch1_2:timbreStrings         | -0.13    | 0.37      | -0.87    | 0.61     | 1.00 | 25233    | 14017    |
| diff_mean_pitch1_2:melody1               | -0.20    | 0.46      | -1.09    | 0.69     | 1.00 | 27389    | 16492    |
| diff_mean_pitch1_2:melody2               | -0.30    | 0.50      | -1.30    | 0.68     | 1.00 | 29897    | 16196    |
| timbreStrings:melody1                    | -0.09    | 0.19      | -0.46    | 0.28     | 1.00 | 22431    | 15332    |
| timbreStrings:melody2                    | 0.03     | 0.17      | -0.29    | 0.36     | 1.00 | 25365    | 16099    |
| diff_mean_pitch1_2:timbreStrings:melody1 | -0.50    | 0.47      | -1.42    | 0.43     | 1.00 | 27184    | 15644    |
| diff_mean_pitch1_2:timbreStrings:melody2 | 0.52     | 0.50      | -0.44    | 1.53     | 1.00 | 29156    | 16242    |

### Uruwa: SDA

Family: bernoulli  
Links: mu = logit  
Formula: bin\_response ~ diff\_mean\_pitch1\_2 \* timbre \* melody + (diff\_mean\_pitch1\_2 \* melody | participant)  
Data: data\_cut\_SDA\_mel (Number of observations: 2009)  
Samples: 4 chains, each with iter = 6000; warmup = 1000; thin = 1;  
total post-warmup samples = 20000

Group-Level Effects:  
\*participant (Number of levels: 67)

|                                                            | Estimate | Est.Error | 1-95% CI | u-95% CI | Rhat | Bulk_ESS | Tail_ESS |
|------------------------------------------------------------|----------|-----------|----------|----------|------|----------|----------|
| sd(Intercept)                                              | 1.20     | 0.14      | 0.95     | 1.50     | 1.00 | 6012     | 10377    |
| sd(diff_mean_pitch1_2)                                     | 0.52     | 0.29      | 0.03     | 1.11     | 1.00 | 4403     | 6569     |
| sd(melody1)                                                | 0.21     | 0.13      | 0.01     | 0.48     | 1.00 | 4559     | 8054     |
| sd(melody2)                                                | 0.36     | 0.14      | 0.06     | 0.62     | 1.00 | 3540     | 3742     |
| sd(diff_mean_pitch1_2:melody1)                             | 0.36     | 0.26      | 0.02     | 0.97     | 1.00 | 8049     | 9868     |
| sd(diff_mean_pitch1_2:melody2)                             | 0.70     | 0.42      | 0.04     | 1.56     | 1.00 | 4882     | 8044     |
| cor(Intercept,diff_mean_pitch1_2)                          | 0.04     | 0.31      | -0.57    | 0.62     | 1.00 | 24169    | 13599    |
| cor(Intercept,melody1)                                     | -0.07    | 0.33      | -0.68    | 0.60     | 1.00 | 24743    | 13400    |
| cor(diff_mean_pitch1_2,melody1)                            | 0.03     | 0.36      | -0.67    | 0.71     | 1.00 | 11575    | 13787    |
| cor(Intercept,melody2)                                     | -0.01    | 0.27      | -0.52    | 0.51     | 1.00 | 20636    | 14545    |
| cor(diff_mean_pitch1_2,melody2)                            | -0.28    | 0.34      | -0.82    | 0.50     | 1.00 | 4326     | 7337     |
| cor(melody1,melody2)                                       | -0.31    | 0.37      | -0.85    | 0.53     | 1.00 | 5145     | 9286     |
| cor(Intercept,diff_mean_pitch1_2:melody1)                  | 0.11     | 0.37      | -0.63    | 0.76     | 1.00 | 28149    | 15060    |
| cor(diff_mean_pitch1_2,diff_mean_pitch1_2:melody1)         | 0.07     | 0.37      | -0.66    | 0.74     | 1.00 | 17326    | 14954    |
| cor(melody1,diff_mean_pitch1_2:melody1)                    | 0.10     | 0.38      | -0.65    | 0.77     | 1.00 | 15905    | 15754    |
| cor(melody2,diff_mean_pitch1_2:melody1)                    | -0.13    | 0.37      | -0.77    | 0.61     | 1.00 | 17644    | 17557    |
| cor(Intercept,diff_mean_pitch1_2:melody2)                  | -0.09    | 0.32      | -0.67    | 0.55     | 1.00 | 25475    | 14602    |
| cor(diff_mean_pitch1_2,diff_mean_pitch1_2:melody2)         | -0.12    | 0.36      | -0.75    | 0.60     | 1.00 | 10018    | 13266    |
| cor(melody1,diff_mean_pitch1_2:melody2)                    | 0.08     | 0.37      | -0.65    | 0.74     | 1.00 | 10153    | 13600    |
| cor(melody2,diff_mean_pitch1_2:melody2)                    | 0.15     | 0.35      | -0.59    | 0.76     | 1.00 | 12336    | 14695    |
| cor(diff_mean_pitch1_2:melody1,diff_mean_pitch1_2:melody2) | -0.08    | 0.38      | -0.75    | 0.66     | 1.00 | 11633    | 15987    |

Population-Level Effects:

|                                          | Estimate | Est.Error | 1-95% CI | u-95% CI | Rhat | Bulk_ESS | Tail_ESS |
|------------------------------------------|----------|-----------|----------|----------|------|----------|----------|
| Intercept                                | 0.24     | 0.15      | -0.06    | 0.54     | 1.00 | 4293     | 7743     |
| diff_mean_pitch1_2                       | 0.22     | 0.18      | -0.13    | 0.57     | 1.00 | 24789    | 15624    |
| timbreStrings                            | -0.10    | 0.16      | -0.40    | 0.21     | 1.00 | 4006     | 7307     |
| melody1                                  | 0.02     | 0.08      | -0.14    | 0.17     | 1.00 | 21601    | 15094    |
| melody2                                  | -0.19    | 0.09      | -0.36    | -0.01    | 1.00 | 19692    | 15467    |
| diff_mean_pitch1_2:timbreStrings         | 0.07     | 0.18      | -0.28    | 0.42     | 1.00 | 25564    | 15477    |
| diff_mean_pitch1_2:melody1               | -0.09    | 0.24      | -0.55    | 0.37     | 1.00 | 20337    | 16116    |
| diff_mean_pitch1_2:melody2               | 0.00     | 0.27      | -0.53    | 0.54     | 1.00 | 21054    | 16008    |
| timbreStrings:melody1                    | -0.11    | 0.08      | -0.27    | 0.05     | 1.00 | 22395    | 16628    |
| timbreStrings:melody2                    | -0.14    | 0.09      | -0.32    | 0.03     | 1.00 | 19617    | 15558    |
| diff_mean_pitch1_2:timbreStrings:melody1 | 0.11     | 0.23      | -0.35    | 0.56     | 1.00 | 20646    | 16899    |
| diff_mean_pitch1_2:timbreStrings:melody2 | -0.32    | 0.27      | -0.85    | 0.22     | 1.00 | 19932    | 15770    |

### Uruwa: Lutheran

Family: bernoulli  
Links: mu = logit  
Formula: bin\_response ~ diff\_mean\_pitch1\_2 \* timbre \* melody + (diff\_mean\_pitch1\_2 \* melody | participant)  
Data: data\_cut\_Lut\_mel (Number of observations: 1080)  
Samples: 4 chains, each with iter = 6000; warmup = 1000; thin = 1;  
total post-warmup samples = 20000

Group-Level Effects:  
\*participant (Number of levels: 36)

|                        | Estimate | Est.Error | 1-95% CI | u-95% CI | Rhat | Bulk_ESS | Tail_ESS |
|------------------------|----------|-----------|----------|----------|------|----------|----------|
| sd(Intercept)          | 0.81     | 0.15      | 0.56     | 1.13     | 1.00 | 7982     | 12860    |
| sd(diff_mean_pitch1_2) | 0.49     | 0.33      | 0.02     | 1.22     | 1.00 | 6619     | 10245    |
| sd(melody1)            | 0.22     | 0.14      | 0.01     | 0.53     | 1.00 | 6798     | 9587     |
| sd(melody2)            | 0.29     | 0.16      | 0.02     | 0.62     | 1.00 | 5913     | 8387     |

```

sd(diff_mean_pitch1_2:melody1)          0.52  0.37  0.02  1.38 1.00  7408 10666
sd(diff_mean_pitch1_2:melody2)          0.50  0.37  0.02  1.36 1.00  9283  9796
cor(Intercept,diff_mean_pitch1_2)       -0.09  0.34  -0.71  0.61 1.00 28227 14979
cor(Intercept,melody1)                   0.01  0.34  -0.64  0.66 1.00 24659 13637
cor(diff_mean_pitch1_2,melody1)          -0.03  0.37  -0.72  0.68 1.00 14226 15370
cor(Intercept,melody2)                   0.06  0.32  -0.57  0.65 1.00 24593 14887
cor(diff_mean_pitch1_2,melody2)          0.05  0.37  -0.66  0.72 1.00 12166 14730
cor(melody1,melody2)                     -0.04  0.37  -0.72  0.68 1.00 12493 14971
cor(Intercept,diff_mean_pitch1_2:melody1) 0.05  0.35  -0.63  0.70 1.00 28845 15031
cor(diff_mean_pitch1_2,diff_mean_pitch1_2:melody1) -0.07  0.38  -0.74  0.67 1.00 18179 15459
cor(melody1,diff_mean_pitch1_2:melody1)  -0.01  0.37  -0.70  0.69 1.00 17556 16739
cor(melody2,diff_mean_pitch1_2:melody1)  -0.00  0.37  -0.70  0.70 1.00 17872 16387
cor(Intercept,diff_mean_pitch1_2:melody2) 0.08  0.37  -0.65  0.74 1.00 32708 15606
cor(diff_mean_pitch1_2,diff_mean_pitch1_2:melody2) -0.00  0.38  -0.71  0.71 1.00 19467 16079
cor(melody1,diff_mean_pitch1_2:melody2)  0.08  0.38  -0.66  0.76 1.00 18991 16815
cor(melody2,diff_mean_pitch1_2:melody2)  0.08  0.37  -0.66  0.75 1.00 16895 16863
cor(diff_mean_pitch1_2:melody1,diff_mean_pitch1_2:melody2) -0.09  0.38  -0.76  0.65 1.00 12048 16786

```

Population-Level Effects:

|                                          | Estimate | Est.Error | 1-95% CI | u-95% CI | Rhat | Bulk_ESS | Tail_ESS |
|------------------------------------------|----------|-----------|----------|----------|------|----------|----------|
| Intercept                                | 0.25     | 0.15      | -0.05    | 0.54     | 1.00 | 8699     | 11706    |
| diff_mean_pitch1_2                       | 0.51     | 0.23      | 0.06     | 0.97     | 1.00 | 24208    | 15333    |
| timbreStrings                            | 0.13     | 0.15      | -0.17    | 0.42     | 1.00 | 8380     | 11781    |
| melody1                                  | -0.26    | 0.11      | -0.48    | -0.06    | 1.00 | 26314    | 15988    |
| melody2                                  | 0.02     | 0.11      | -0.20    | 0.24     | 1.00 | 23842    | 15780    |
| diff_mean_pitch1_2:timbreStrings         | 0.02     | 0.23      | -0.43    | 0.48     | 1.00 | 25956    | 14827    |
| diff_mean_pitch1_2:melody1               | -0.54    | 0.31      | -1.14    | 0.06     | 1.00 | 23098    | 16038    |
| diff_mean_pitch1_2:melody2               | 0.16     | 0.33      | -0.48    | 0.82     | 1.00 | 25423    | 16501    |
| timbreStrings:melody1                    | -0.06    | 0.11      | -0.27    | 0.15     | 1.00 | 25285    | 15635    |
| timbreStrings:melody2                    | 0.20     | 0.11      | -0.02    | 0.42     | 1.00 | 22430    | 15401    |
| diff_mean_pitch1_2:timbreStrings:melody1 | -0.12    | 0.30      | -0.72    | 0.46     | 1.00 | 24029    | 16096    |
| diff_mean_pitch1_2:timbreStrings:melody2 | -0.18    | 0.33      | -0.83    | 0.49     | 1.00 | 26203    | 16956    |

## Sydney: Non-musician

```

Family: bernoulli
Links: mu = logit
Formula: bin_response ~ diff_mean_pitch1_2 * timbre * melody + (diff_mean_pitch1_2 * melody | participant)
Data: data_cut_nonmus_mel (Number of observations: 1800)
Samples: 4 chains, each with iter = 6000; warmup = 1000; thin = 1;
total post-warmup samples = 20000

```

Group-Level Effects:

~participant (Number of levels: 60)

|                                                            | Estimate | Est.Error | 1-95% CI | u-95% CI | Rhat | Bulk_ESS | Tail_ESS |
|------------------------------------------------------------|----------|-----------|----------|----------|------|----------|----------|
| sd(Intercept)                                              | 0.46     | 0.09      | 0.29     | 0.64     | 1.00 | 8977     | 11732    |
| sd(diff_mean_pitch1_2)                                     | 1.65     | 0.29      | 1.12     | 2.26     | 1.00 | 9595     | 13038    |
| sd(melody1)                                                | 0.18     | 0.12      | 0.01     | 0.44     | 1.00 | 5970     | 8673     |
| sd(melody2)                                                | 0.25     | 0.13      | 0.02     | 0.51     | 1.00 | 4570     | 8272     |
| sd(diff_mean_pitch1_2:melody1)                             | 0.44     | 0.32      | 0.02     | 1.17     | 1.00 | 6448     | 10234    |
| sd(diff_mean_pitch1_2:melody2)                             | 0.52     | 0.35      | 0.02     | 1.31     | 1.00 | 7901     | 10363    |
| cor(Intercept,diff_mean_pitch1_2)                          | 0.17     | 0.21      | -0.25    | 0.57     | 1.00 | 5856     | 10303    |
| cor(Intercept,melody1)                                     | -0.10    | 0.34      | -0.72    | 0.58     | 1.00 | 21051    | 14784    |
| cor(diff_mean_pitch1_2,melody1)                            | -0.22    | 0.34      | -0.78    | 0.53     | 1.00 | 18700    | 15612    |
| cor(Intercept,melody2)                                     | 0.19     | 0.32      | -0.50    | 0.74     | 1.00 | 16551    | 14388    |
| cor(diff_mean_pitch1_2,melody2)                            | -0.06    | 0.31      | -0.64    | 0.56     | 1.00 | 18373    | 13705    |
| cor(melody1,melody2)                                       | -0.00    | 0.36      | -0.68    | 0.69     | 1.00 | 10329    | 12628    |
| cor(Intercept,diff_mean_pitch1_2:melody1)                  | 0.11     | 0.35      | -0.60    | 0.73     | 1.00 | 23496    | 14586    |
| cor(diff_mean_pitch1_2,diff_mean_pitch1_2:melody1)         | -0.07    | 0.35      | -0.71    | 0.63     | 1.00 | 23130    | 16080    |
| cor(melody1,diff_mean_pitch1_2:melody1)                    | 0.01     | 0.37      | -0.70    | 0.70     | 1.00 | 18074    | 16103    |
| cor(melody2,diff_mean_pitch1_2:melody1)                    | 0.01     | 0.37      | -0.69    | 0.70     | 1.00 | 17710    | 15792    |
| cor(Intercept,diff_mean_pitch1_2:melody2)                  | -0.12    | 0.35      | -0.73    | 0.59     | 1.00 | 22909    | 14890    |
| cor(diff_mean_pitch1_2,diff_mean_pitch1_2:melody2)         | 0.26     | 0.35      | -0.51    | 0.82     | 1.00 | 19079    | 14422    |
| cor(melody1,diff_mean_pitch1_2:melody2)                    | -0.08    | 0.37      | -0.74    | 0.65     | 1.00 | 17159    | 16251    |
| cor(melody2,diff_mean_pitch1_2:melody2)                    | 0.04     | 0.36      | -0.66    | 0.71     | 1.00 | 17447    | 16557    |
| cor(diff_mean_pitch1_2:melody1,diff_mean_pitch1_2:melody2) | -0.11    | 0.38      | -0.77    | 0.64     | 1.00 | 14939    | 17161    |

Population-Level Effects:

|                                          | Estimate | Est.Error | 1-95% CI | u-95% CI | Rhat | Bulk_ESS | Tail_ESS |
|------------------------------------------|----------|-----------|----------|----------|------|----------|----------|
| Intercept                                | -0.23    | 0.08      | -0.39    | -0.08    | 1.00 | 14598    | 15469    |
| diff_mean_pitch1_2                       | 2.06     | 0.28      | 1.51     | 2.61     | 1.00 | 13490    | 14078    |
| timbreStrings                            | -0.08    | 0.08      | -0.24    | 0.08     | 1.00 | 14099    | 15091    |
| melody1                                  | -0.34    | 0.09      | -0.51    | -0.17    | 1.00 | 22460    | 16708    |
| melody2                                  | 0.02     | 0.09      | -0.15    | 0.19     | 1.00 | 23138    | 16458    |
| diff_mean_pitch1_2:timbreStrings         | -0.09    | 0.27      | -0.62    | 0.43     | 1.00 | 14715    | 14848    |
| diff_mean_pitch1_2:melody1               | -0.12    | 0.25      | -0.60    | 0.37     | 1.00 | 24032    | 16693    |
| diff_mean_pitch1_2:melody2               | -0.21    | 0.27      | -0.74    | 0.33     | 1.00 | 23833    | 15288    |
| timbreStrings:melody1                    | 0.09     | 0.09      | -0.08    | 0.26     | 1.00 | 23357    | 15873    |
| timbreStrings:melody2                    | -0.05    | 0.09      | -0.22    | 0.12     | 1.00 | 23000    | 16195    |
| diff_mean_pitch1_2:timbreStrings:melody1 | -0.15    | 0.24      | -0.62    | 0.32     | 1.00 | 23844    | 17008    |
| diff_mean_pitch1_2:timbreStrings:melody2 | 0.27     | 0.27      | -0.27    | 0.81     | 1.00 | 23715    | 16325    |

## Sydney: Musician

```

Family: bernoulli
Links: mu = logit
Formula: bin_response ~ diff_mean_pitch1_2 * timbre * melody + (diff_mean_pitch1_2 * melody | participant)
Data: data_cut_mus_mel (Number of observations: 570)
Samples: 4 chains, each with iter = 6000; warmup = 1000; thin = 1;
total post-warmup samples = 20000

```

Group-Level Effects:

~participant (Number of levels: 19)

|                                                            | Estimate | Est.Error | 1-95% CI | u-95% CI | Rhat | Bulk_ESS | Tail_ESS |
|------------------------------------------------------------|----------|-----------|----------|----------|------|----------|----------|
| sd(Intercept)                                              | 0.23     | 0.16      | 0.01     | 0.61     | 1.00 | 8600     | 10549    |
| sd(diff_mean_pitch1_2)                                     | 2.94     | 0.82      | 1.59     | 4.79     | 1.00 | 10695    | 14273    |
| sd(melody1)                                                | 0.21     | 0.16      | 0.01     | 0.60     | 1.00 | 13539    | 11518    |
| sd(melody2)                                                | 0.29     | 0.21      | 0.01     | 0.78     | 1.00 | 8710     | 10115    |
| sd(diff_mean_pitch1_2:melody1)                             | 0.84     | 0.66      | 0.03     | 2.46     | 1.00 | 10510    | 10277    |
| sd(diff_mean_pitch1_2:melody2)                             | 0.96     | 0.74      | 0.04     | 2.75     | 1.00 | 10280    | 11004    |
| cor(Intercept,diff_mean_pitch1_2)                          | -0.12    | 0.35      | -0.75    | 0.59     | 1.00 | 5262     | 9588     |
| cor(Intercept,melody1)                                     | 0.05     | 0.38      | -0.67    | 0.74     | 1.00 | 27396    | 15398    |
| cor(diff_mean_pitch1_2,melody1)                            | -0.11    | 0.37      | -0.76    | 0.62     | 1.00 | 26576    | 15391    |
| cor(Intercept,melody2)                                     | 0.09     | 0.38      | -0.66    | 0.75     | 1.00 | 20834    | 15220    |
| cor(diff_mean_pitch1_2,melody2)                            | -0.03    | 0.35      | -0.69    | 0.65     | 1.00 | 25071    | 15867    |
| cor(melody1,melody2)                                       | -0.06    | 0.39      | -0.75    | 0.69     | 1.00 | 15977    | 15248    |
| cor(Intercept,diff_mean_pitch1_2:melody1)                  | 0.02     | 0.38      | -0.70    | 0.72     | 1.00 | 23941    | 14843    |
| cor(diff_mean_pitch1_2,diff_mean_pitch1_2:melody1)         | -0.08    | 0.36      | -0.73    | 0.63     | 1.00 | 25761    | 14801    |
| cor(melody1,diff_mean_pitch1_2:melody1)                    | 0.01     | 0.38      | -0.71    | 0.71     | 1.00 | 17802    | 14954    |
| cor(melody2,diff_mean_pitch1_2:melody1)                    | 0.03     | 0.37      | -0.69    | 0.72     | 1.00 | 17536    | 16425    |
| cor(Intercept,diff_mean_pitch1_2:melody2)                  | 0.00     | 0.38      | -0.69    | 0.70     | 1.00 | 24590    | 15259    |
| cor(diff_mean_pitch1_2,diff_mean_pitch1_2:melody2)         | 0.05     | 0.36      | -0.65    | 0.72     | 1.00 | 27809    | 16041    |
| cor(melody1,diff_mean_pitch1_2:melody2)                    | -0.05    | 0.38      | -0.74    | 0.67     | 1.00 | 18886    | 16738    |
| cor(melody2,diff_mean_pitch1_2:melody2)                    | 0.00     | 0.37      | -0.69    | 0.70     | 1.00 | 17361    | 16714    |
| cor(diff_mean_pitch1_2:melody1,diff_mean_pitch1_2:melody2) | -0.04    | 0.38      | -0.73    | 0.70     | 1.00 | 15226    | 17486    |

Population-Level Effects:

|                                          | Estimate | Est.Error | 1-95% CI | u-95% CI | Rhat | Bulk_ESS | Tail_ESS |
|------------------------------------------|----------|-----------|----------|----------|------|----------|----------|
| Intercept                                | -0.23    | 0.14      | -0.52    | 0.04     | 1.00 | 22856    | 14799    |
| diff_mean_pitch1_2                       | 6.31     | 0.94      | 4.49     | 8.20     | 1.00 | 12806    | 13675    |
| timbreStrings                            | -0.04    | 0.14      | -0.31    | 0.24     | 1.00 | 22827    | 16207    |
| melody1                                  | -0.41    | 0.20      | -0.80    | -0.03    | 1.00 | 23866    | 15756    |
| melody2                                  | 0.33     | 0.20      | -0.05    | 0.72     | 1.00 | 21919    | 14392    |
| diff_mean_pitch1_2:timbreStrings         | 0.33     | 0.67      | -0.97    | 1.71     | 1.00 | 18556    | 14751    |
| diff_mean_pitch1_2:melody1               | -0.64    | 0.60      | -1.85    | 0.51     | 1.00 | 24799    | 16350    |
| diff_mean_pitch1_2:melody2               | 0.03     | 0.61      | -1.15    | 1.28     | 1.00 | 24922    | 14663    |
| timbreStrings:melody1                    | 0.28     | 0.19      | -0.09    | 0.66     | 1.00 | 21906    | 15283    |
| timbreStrings:melody2                    | 0.08     | 0.19      | -0.29    | 0.46     | 1.00 | 21736    | 16405    |
| diff_mean_pitch1_2:timbreStrings:melody1 | -0.42    | 0.59      | -1.61    | 0.70     | 1.00 | 25977    | 15640    |
| diff_mean_pitch1_2:timbreStrings:melody2 | 0.15     | 0.59      | -1.01    | 1.33     | 1.00 | 26532    | 15948    |

## Cadences and melodies

### Uruwa: Minimal

Family: bernoulli  
 Links: mu = logit  
 Formula: bin\_response ~ diff\_mean\_pitch1\_2 \* timbre + (diff\_mean\_pitch1\_2 | participant)  
 Data: data\_cut\_min\_cad\_mel (Number of observations: 773)  
 Samples: 4 chains, each with iter = 6000; warmup = 1000; thin = 1;  
 total post-warmup samples = 20000

Group-Level Effects:  
 ~participant (Number of levels: 19)

|                                   | Estimate | Est.Error | 1-95% CI | u-95% CI | Rhat | Bulk_ESS | Tail_ESS |
|-----------------------------------|----------|-----------|----------|----------|------|----------|----------|
| sd(Intercept)                     | 1.34     | 0.28      | 0.89     | 1.98     | 1.00 | 4922     | 9299     |
| sd(diff_mean_pitch1_2)            | 0.21     | 0.16      | 0.01     | 0.59     | 1.00 | 7930     | 7598     |
| cor(Intercept,diff_mean_pitch1_2) | -0.19    | 0.54      | -0.97    | 0.89     | 1.00 | 15485    | 11230    |

Population-Level Effects:

|                                  | Estimate | Est.Error | 1-95% CI | u-95% CI | Rhat | Bulk_ESS | Tail_ESS |
|----------------------------------|----------|-----------|----------|----------|------|----------|----------|
| Intercept                        | -0.25    | 0.31      | -0.87    | 0.35     | 1.00 | 3427     | 6853     |
| diff_mean_pitch1_2               | -0.05    | 0.14      | -0.33    | 0.23     | 1.00 | 17970    | 13600    |
| timbreStrings                    | -0.11    | 0.31      | -0.73    | 0.50     | 1.00 | 3960     | 7098     |
| diff_mean_pitch1_2:timbreStrings | 0.04     | 0.14      | -0.23    | 0.32     | 1.00 | 18456    | 13748    |

### Uruwa: SDA

Family: bernoulli  
 Links: mu = logit  
 Formula: bin\_response ~ diff\_mean\_pitch1\_2 \* timbre + (diff\_mean\_pitch1\_2 | participant)  
 Data: data\_cut\_SDA\_cad\_mel (Number of observations: 2717)  
 Samples: 4 chains, each with iter = 6000; warmup = 1000; thin = 1;  
 total post-warmup samples = 20000

Group-Level Effects:  
 ~participant (Number of levels: 69)

|                                   | Estimate | Est.Error | 1-95% CI | u-95% CI | Rhat | Bulk_ESS | Tail_ESS |
|-----------------------------------|----------|-----------|----------|----------|------|----------|----------|
| sd(Intercept)                     | 1.04     | 0.12      | 0.82     | 1.30     | 1.00 | 4468     | 7632     |
| sd(diff_mean_pitch1_2)            | 0.13     | 0.10      | 0.01     | 0.36     | 1.00 | 5351     | 6895     |
| cor(Intercept,diff_mean_pitch1_2) | 0.04     | 0.52      | -0.91    | 0.92     | 1.00 | 17215    | 12110    |

Population-Level Effects:

|                                  | Estimate | Est.Error | 1-95% CI | u-95% CI | Rhat | Bulk_ESS | Tail_ESS |
|----------------------------------|----------|-----------|----------|----------|------|----------|----------|
| Intercept                        | 0.24     | 0.13      | -0.02    | 0.50     | 1.00 | 2647     | 5101     |
| diff_mean_pitch1_2               | 0.14     | 0.07      | 0.01     | 0.27     | 1.00 | 19705    | 14658    |
| timbreStrings                    | -0.01    | 0.13      | -0.26    | 0.26     | 1.00 | 2456     | 5022     |
| diff_mean_pitch1_2:timbreStrings | 0.01     | 0.07      | -0.12    | 0.14     | 1.00 | 22652    | 14540    |

### Uruwa: Lutheran

Family: bernoulli  
 Links: mu = logit  
 Formula: bin\_response ~ diff\_mean\_pitch1\_2 \* timbre + (diff\_mean\_pitch1\_2 | participant)  
 Data: data\_cut\_Lut\_cad\_mel (Number of observations: 1500)  
 Samples: 4 chains, each with iter = 6000; warmup = 1000; thin = 1;  
 total post-warmup samples = 20000

Group-Level Effects:  
 ~participant (Number of levels: 38)

|                                   | Estimate | Est.Error | 1-95% CI | u-95% CI | Rhat | Bulk_ESS | Tail_ESS |
|-----------------------------------|----------|-----------|----------|----------|------|----------|----------|
| sd(Intercept)                     | 0.77     | 0.13      | 0.54     | 1.05     | 1.00 | 5797     | 10015    |
| sd(diff_mean_pitch1_2)            | 0.38     | 0.16      | 0.05     | 0.71     | 1.00 | 4077     | 4731     |
| cor(Intercept,diff_mean_pitch1_2) | -0.22    | 0.36      | -0.86    | 0.53     | 1.00 | 10202    | 7566     |

Population-Level Effects:

|                                  | Estimate | Est.Error | 1-95% CI | u-95% CI | Rhat | Bulk_ESS | Tail_ESS |
|----------------------------------|----------|-----------|----------|----------|------|----------|----------|
| Intercept                        | 0.23     | 0.14      | -0.04    | 0.50     | 1.00 | 4575     | 7672     |
| diff_mean_pitch1_2               | 0.27     | 0.11      | 0.05     | 0.49     | 1.00 | 14036    | 13570    |
| timbreStrings                    | 0.16     | 0.14      | -0.10    | 0.44     | 1.00 | 4551     | 7589     |
| diff_mean_pitch1_2:timbreStrings | 0.11     | 0.11      | -0.11    | 0.32     | 1.00 | 13592    | 13205    |

### Sydney: Non-musician

Family: bernoulli  
 Links: mu = logit  
 Formula: bin\_response ~ diff\_mean\_pitch1\_2 \* timbre + (diff\_mean\_pitch1\_2 | participant)  
 Data: data\_cut\_nonmus\_cad\_mel (Number of observations: 2507)  
 Samples: 4 chains, each with iter = 6000; warmup = 1000; thin = 1;  
 total post-warmup samples = 20000

Group-Level Effects:  
 ~participant (Number of levels: 60)

|                                   | Estimate | Est.Error | 1-95% CI | u-95% CI | Rhat | Bulk_ESS | Tail_ESS |
|-----------------------------------|----------|-----------|----------|----------|------|----------|----------|
| sd(Intercept)                     | 0.33     | 0.07      | 0.21     | 0.47     | 1.00 | 9127     | 12083    |
| sd(diff_mean_pitch1_2)            | 0.67     | 0.12      | 0.45     | 0.92     | 1.00 | 8994     | 12190    |
| cor(Intercept,diff_mean_pitch1_2) | 0.67     | 0.19      | 0.24     | 0.97     | 1.00 | 3589     | 5142     |

Population-Level Effects:

|                                  | Estimate | Est.Error | 1-95% CI | u-95% CI | Rhat | Bulk_ESS | Tail_ESS |
|----------------------------------|----------|-----------|----------|----------|------|----------|----------|
| Intercept                        | -0.19    | 0.06      | -0.31    | -0.07    | 1.00 | 11123    | 13796    |
| diff_mean_pitch1_2               | 1.02     | 0.12      | 0.80     | 1.26     | 1.00 | 11613    | 13458    |
| timbreStrings                    | -0.07    | 0.06      | -0.19    | 0.05     | 1.00 | 11969    | 14330    |
| diff_mean_pitch1_2:timbreStrings | -0.12    | 0.11      | -0.35    | 0.10     | 1.00 | 11343    | 13630    |



## Sydney: Musician

```
Family: bernoulli
Links: mu = logit
Formula: bin_response ~ diff_mean_pitch1_2 * timbre + (diff_mean_pitch1_2 | participant)
Data: data_cut_mus_cad_mel (Number of observations: 798)
Samples: 4 chains, each with iter = 6000; warmup = 1000; thin = 1;
         total post-warmup samples = 20000
```

### Group-Level Effects:

~participant (Number of levels: 19)

|                                   | Estimate | Est.Error | 1-95% CI | u-95% CI | Rhat | Bulk_ESS | Tail_ESS |
|-----------------------------------|----------|-----------|----------|----------|------|----------|----------|
| sd(Intercept)                     | 0.10     | 0.08      | 0.00     | 0.30     | 1.00 | 10343    | 9553     |
| sd(diff_mean_pitch1_2)            | 0.35     | 0.23      | 0.02     | 0.87     | 1.00 | 6167     | 7725     |
| cor(Intercept,diff_mean_pitch1_2) | 0.03     | 0.57      | -0.94    | 0.95     | 1.00 | 7252     | 11086    |

### Population-Level Effects:

|                                  | Estimate | Est.Error | 1-95% CI | u-95% CI | Rhat | Bulk_ESS | Tail_ESS |
|----------------------------------|----------|-----------|----------|----------|------|----------|----------|
| Intercept                        | -0.10    | 0.09      | -0.27    | 0.07     | 1.00 | 20481    | 14232    |
| diff_mean_pitch1_2               | 1.56     | 0.19      | 1.21     | 1.95     | 1.00 | 12505    | 11703    |
| timbreStrings                    | -0.03    | 0.09      | -0.20    | 0.14     | 1.00 | 18748    | 13842    |
| diff_mean_pitch1_2:timbreStrings | -0.10    | 0.18      | -0.47    | 0.25     | 1.00 | 12472    | 12864    |

## References

- [1] Norman Carey and David Clampitt. Aspects of well-formed scales. *Music Theory Spectrum*, 11 (2):187–206, 1989.
- [2] Adrienne L. Kaeppler, Amy Ku’uleialoha Stillman, Demeter Tsounis, Catherine Falk, Dorothy O’Donnell, Linda Barwick, Michael Ryan, Helen Reeves Lawrence, Don Niles, Rokucho Billy, Kim Bailey, Donald Brenneis, Ricardo D. Trimillos, Ted Salís, Lynn J. Martin, Judy Van Zile, Allan Thomas, and Jennie Coleman. *The Garland Encyclopedia of World Music: Australia and the Pacific Islands*, volume 9, chapter Introduction to Oceania and its Music: Musical Migrations, pages 54–69. Garland Publishing Inc., 1998.
- [3] E. A. Smit, F. A. Dobrowohl, N. K. Schaal, Andrew J. Milne, and S. A. Herff. Perceived emotions of harmonic cadences. *Music & Science*, 3, 2020. doi: 10.1177/2059204320938635.
- [4] H. S. Sarvasy. *A grammar of Nungon: A Papuan language of northeast New Guinea*. Brill, 2017.
- [5] J. Wegmann and U. Wegmann. Yau anthropology background study. Unpublished manuscript, 1994.
- [6] Adrienne L. Kaeppler and Don Niles. *The Garland Encyclopedia of World Music: Australia and the Pacific Islands*, volume 9, chapter The Music and Dance of New Guinea, pages 498–513. Garland Publishing Inc., 1998.
- [7] Denis Crowdy. *Guitar Style, Open Tunings, and Stringband Music in Papua New Guinea*. Apwiti-hire: studies in Papua New Guinea musics. Institute of Papua New Guinea Studies, Boroko, Papua New Guinea, 2005.
- [8] Michael Webb. *Palang* conformity and *fulset* freedom: Encountering Pentecostalism’s “sensational” liturgical forms in the postmissionary church in Lae, Papua New Guinea. *Ethnomusicology*, 55(3):445–472, 2011.
- [9] A. Capell. A typology of concept domination. *Lingua*, 15:451–462, 1950.
- [10] B. S. Atal. Automatic speaker recognition based on pitch contours. *The Journal of the Acoustical Society of America*, 52(6B):1687–1697, 1972.
- [11] Julius O. Smith III. Spectral audio signal processing: Quadratic interpolation of spectral peaks.
- [12] Andrew J. Milne, William A. Sethares, Robin Laney, and David B. Sharp. Modelling the similarity of pitch collections with expectation tensors. *Journal of Mathematics and Music*, 5(1):1–20, may 2011.
- [13] Nori Jacoby, Elizabeth Hellmuth Margulis, Martin Clayton, Erin Hannon, Henkjan Honing, John Iversen, Tobias Robert Klein, Samuel A. Mehr, Lara Pearson, Isabelle Peretz, Marc Perlman, Rainer Polak, Andrea Ravignani, Patrick E. Savage, Gavin Steingo, Catherine J. Stevens, Laurel Trainor, Sandra Trehub, Michael Veal, and Melanie Wald-Fuhrmann. Cross-cultural work in music cognition: Challenges, insights, and recommendations. *Music Perception*, 37(3):185–195, 2020. doi: 10.1525/mp.2020.37.3.185.
- [14] G. Athanasopoulos, T. Eerola, I. Lahdelma, and M. Kaliakatsos-Papakostas. Harmonic organisation conveys both universal and culture-specific cues for emotional expression in music. *PLOS One*, 16(1):1–17, 2021. doi: 10.1371/journal.pone.0244964.
